# Supplementary material for: Melanoma-Derived iPCCs Show Differential Tumorigenicity and Therapy Response
Source: PubMed Central journal article supplement — Stem Cell Reports. 2017 Apr 6;8(5):1379–91. doi: 10.1016/j.stemcr.2017.03.007 (PMC5425615; doi:10.1016/j.stemcr.2017.03.007), 2017-04-06
Supplement: mmc2.pdf [file mmc2.pdf]

# Melanoma-Derived iPCCs Show Differential Tumorigenicity and Therapy Response

Mathias Bernhardt,<sup>1,2</sup> Daniel Novak,<sup>1,2</sup> Yassen Assenov,<sup>3</sup> Elias Orouji,<sup>1,2</sup> Nathalie Knappe,<sup>1,2</sup> Kasia Weina,<sup>1,2</sup> Maike Reith,<sup>1,2</sup> Lionel Larribere,<sup>1,2</sup> Christoffer Gebhardt,<sup>1,2</sup> Christoph Plass,<sup>3</sup> Viktor Umansky,<sup>1,2</sup> and Jochen Utikal<sup>1,2,\*</sup>

<sup>1</sup>Skin Cancer Unit (G300), German Cancer Research Center (DKFZ), Im Neuenheimer Feld 280, 69120 Heidelberg, Germany

<sup>2</sup>Department of Dermatology, Venereology and Allergology, University Medical Center Mannheim, Ruprecht-Karl University of Heidelberg, 68167 Mannheim, Germany

<sup>3</sup>Division of Epigenomics and Cancer Risk Factors, German Cancer Research Center (DKFZ), 69120 Heidelberg, Germany

\*Correspondence: [j.utikal@dkfz-heidelberg.de](mailto:j.utikal@dkfz-heidelberg.de)

<http://dx.doi.org/10.1016/j.stemcr.2017.03.007>

## SUMMARY

A point mutation in the *BRAF* gene, leading to a constitutively active form of the protein, is present in 45%–60% of patients and acts as a key driver in melanoma. Shortly after therapy induction, resistance to MAPK pathway-specific inhibitors develops, indicating that pathway inhibition is circumvented by epigenetic mechanisms. Here, we mimicked epigenetic modifications in melanoma cells by reprogramming them into metastable induced pluripotent cancer cells (iPCCs) with the ability to terminally differentiate into non-tumorigenic lineages. iPCCs and their differentiated progeny were characterized by an increased resistance against targeted therapies, although the cells harbor the same oncogenic mutations and signaling activity as the parental melanoma cells. Furthermore, induction of a pluripotent state allowed the melanoma-derived cells to acquire a non-tumorigenic cell fate, further suggesting that tumorigenicity is influenced by the cell state.

## INTRODUCTION

The discovery that development is not a one-way street but can be reverted by nuclear reprogramming leading to induced pluripotent stem cells (iPSCs) is one of the most promising recent discoveries in translational medicine (Larribere and Utikal, 2014; Tabar and Studer, 2014). Patient-specific iPSCs not only allow for the modeling of distinct diseases and testing of novel drugs, but also provide unique resources for regenerative medicine (Galach and Utikal, 2011). The possibility to differentiate human iPSCs (hiPSCs) into distinct neuronal cells is already beginning to revolutionize research in the neurodegenerative disease field, indicated by the escalating number of publications focusing on hiPSC-derived neurodegenerative disease models (Lojewski et al., 2014; Stanslowsky et al., 2014; Japtok et al., 2015). Nevertheless, the full potential of hiPSCs is not yet utilized. Using hiPSCs to study the influence of the differentiation state on disease-associated mutations is still in its infancy.

Nuclear reprogramming is initiated by ectopic expression of the four transcription factors OCT4, SOX2, KLF4, and MYC. During this process the epigenetic profile of a somatic cell is reverted in stepwise fashion to the profile of pluripotent stem cells (PSCs), which are able to differentiate into any cell of the three germ layers (Takahashi and Yamanaka, 2006; Maherali et al., 2007; Takahashi et al., 2007). Using patient-derived somatic cells, the initiation of even genetically complex diseases such as Alzheimer's disease (Yagi et al., 2011), multiple sclerosis (reviewed in Di Ruscio et al., 2015), or early events in tumor initiation (Kim et al., 2013) can be modeled. Therefore, iPSC technol-

ogy enables investigation not only of early events during the onset of a disease but also the influence of the epigenetic status on the disease. Although previous studies successfully demonstrated reprogramming of cancer cells, reprogramming barriers prevent the successful induction of pluripotency in the majority of tumor cells (Utikal et al., 2009; Bernhardt et al., 2012; Kim et al., 2013).

Here, we applied nuclear reprogramming to different human tumor cell lines. Independent of the mutational status or tumor entity, the constitutive overexpression of the three reprogramming factors OCT4, SOX2, and KLF4 was sufficient to generate iPSC-like tumor cells in the presence of human leukemia inhibitory factor (LIF) that show typical characteristics of murine embryonic stem cells (mESCs). Reprogrammed HT-144 melanoma cells acquired a metastable pluripotent state and could be differentiated into cells of all three germ layers in vivo, and generated neuronal and fibroblast-like cell types in vitro. Notably, reprogrammed cells and their differentiated progeny lost typical melanoma markers and failed to initiate novel melanomas. Moreover, reduced tumorigenicity came together with an increased therapy resistance against the mitogen-activated protein kinase (MAPK) kinase inhibitors vemurafenib and trametinib.

## RESULTS

### Generation and Characterization of iPCCs

Previously the induction of a pluripotent state in murine melanoma cells by somatic cell nuclear transfer (Hochedlinger et al., 2004) and nuclear reprogramming (Utikal

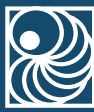

et al., 2009) was reported, demonstrating that a reprogrammed melanoma genome can even give rise to a viable organism. Oncogenes represent barriers impeding the reprogramming process (Liu et al., 2015). Accordingly, several studies reported that cancer cell reprogramming is less effective and more time consuming (Utikal et al., 2009; Lin and Chui, 2012; Lai et al., 2013). To address the question of whether human melanoma cells are amenable to nuclear reprogramming, we used a reverse tetracycline-dependent transactivator (rtTA) and a doxycycline-inducible lentiviral polycistronic vector carrying the reprogramming factors. Since MYC is known to be endogenously expressed in the melanoma cell lines with which we worked, we used OCT4, KLF4, and SOX2 only (Figure S1A) (Kraehn et al., 2001; Sarkar et al., 2006; Bartholomeusz et al., 2007; Zhuang et al., 2008). Tumor cells carrying the rtTA and the reprogramming factors were subjected to doxycycline-induced expression of the transgenes and manually transferred onto feeder cells (Figure 1A). Constitutive expression of the reprogramming factors resulted in the appearance of alkaline phosphatase-positive colonies. These iPSC-like tumor cells showed morphological features of mESCs (Figure 1B) and were similarly resistant to single-cell dissociation without Rho kinase inhibitor (Y-27632), although its addition significantly increased cell survival.

As reactivation of the pluripotency network is a hallmark of successfully reprogrammed cells, we quantified the expression levels of pluripotency markers in reprogrammed melanoma cells compared with iPSCs derived from somatic cells (Figures 1C and 1D). Independent of the mutational status, all melanoma cell lines subjected to nuclear reprogramming reactivated the endogenous loci of pluripotency factors such as *NANOG*, *SOX2*, *SALL4*, and *TRA-1-60* (Figures 1C, 1D, S1C, and S1D). Furthermore, we included HeLa cells in the study and demonstrated that human cervical carcinoma cells are also amenable to reprogramming. Since HeLa cells are known to have an amplification of chromosomal region 8q24 which carries the *MYC* locus (Macville et al., 1999) and since there is evidence that the protein is expressed in these cells (Cappellen et al., 2007), we also reprogrammed them without *MYC* (Figure S2). We draw the conclusion that tumor cells have the ability to reactivate the pluripotency network independent of their origin and mutational load.

We named these iPSC-like tumor cells induced pluripotent cancer cells (iPCCs). Surprisingly, only a slight increase in *OCT4* expression was observed (Figure 1C), suggesting that tumor cells harbor barriers impeding the reactivation of *OCT4*.

Similar to iPSCs derived from somatic cells (Kim et al., 2010; Bar-Nur et al., 2011; Nukaya et al., 2015),

iPCCs lost markers of their lineage of origin. Accordingly, we observed a downregulation of melanocytic markers such as *MITF* and *TRP1* as well as *SOX10* and *AP2* compared with the parental melanoma cells (Figure 1E). Also, iPCCs cluster closer to iPSCs compared with their parental cells of origin and express development-associated TGF- $\beta$  superfamily members *NODAL*, *LEFTY1*, and *LEFTY2* as well as the epigenetic modifier *DNMT3L* (Figures 2A–2C).

To assess whether iPCCs acquired a stable pluripotent state, we withdrew doxycycline, thereby stopping reprogramming factor expression. Within 80 hr after withdrawal, *NANOG* expression levels were reduced by 90% (Figure 1F), followed by morphological changes and loss of alkaline phosphatase activity (Figure S3). This indicated that the tumor cells could not acquire a stable pluripotent state. To exclude the possibility that the reprogramming process is particularly impeded in tumor cells, we transferred fully reprogrammed melanocyte-derived iPSCs to feeder cells after transgene expression was induced. After two to three passages in the presence of doxycycline on dense feeder cells, the iPSCs formed colonies indistinguishable from the iPCCs (Figure S1B). Together, these data indicate that the metastable pluripotent state is an effect based on the constitutive expression of reprogramming factors and dense feeder cells serving as substrate. Thereby, the partial pluripotent state is not restricted to cancer cells but can also be induced in already fully reprogrammed iPSCs.

To further characterize the cells, we injected HT-144-iPCCs subcutaneously in the flanks of NOD/SCID mice. In all cases tumors developed after 10–12 weeks. Excised tumors stained with H&E demonstrated that the iPCCs differentiated into tissues derived from all three germ layers (Figure 1G).

A previous publication demonstrated that tumor-iPSCs resemble early stages of tumor development in vivo (Kim et al., 2013). Hence, we analyzed the expression of typical melanoma and standard tumor markers in tumors derived from iPCCs and the parental melanoma cells (Figures 3A–3D). Parental tumor lines generated homogeneous S100B-positive melanomas with high expression of the proliferation marker *Ki67*, and were negative for epithelial cytokeratins. In contrast, iPCC-derived teratomas showed multiple areas of differentiated foci that were architecturally organized and contained irregularly shaped cells with enlarged cytoplasm. In addition, formation of gland-like structures was observed in most of the tumors that developed from iPCCs. Independent of the mutational status, iPCC-derived tumors rarely generated any S100B-positive melanoma-like structures. Furthermore, we observed epithelial structures in iPCC-derived tumors. According to the heterogeneous pattern of cellular differentiations, the proliferation marker

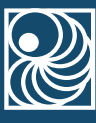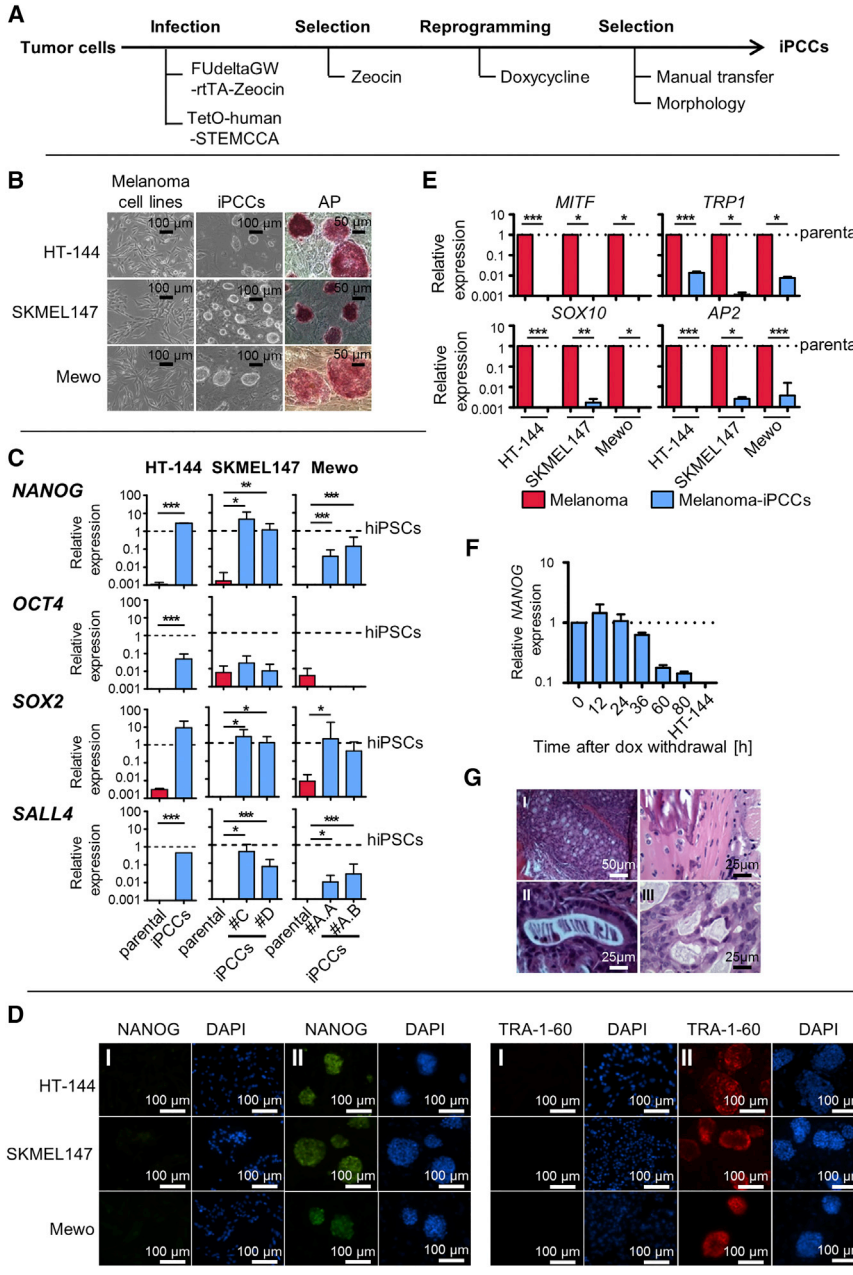

**Figure 1. Generation and Characterization of Metastable Reprogrammed Melanoma Cells**

(A) Scheme for tumor cell reprogramming. (B) Reprogrammed tumor cells form ESC-like alkaline phosphatase-positive colonies on feeder cells.

(C) qPCR measurement shows reactivation of the endogenous loci of the pluripotency markers *NANOG*, *SOX2*, and *SALL4* but only mild increase in endogenous *OCT4* expression. *GAPDH* was used as endogenous control and hiPSCs as reference sample. Indicated is the mean ± SD. p Values were calculated by two-tailed, unpaired sample t test of technical triplicates in two clones of SKMEL147- and Mewo-iPCCs and in three independent experiments of HT-144-iPCCs. Asterisk indicates t test p value of ≤ 0.05 in comparison with the respective reference (\*p ≤ 0.05, \*\*p ≤ 0.01, \*\*\*p ≤ 0.005).

(D) Immunofluorescence staining of NANOG and TRA-1-60 in the parental melanoma cells (I) and melanoma iPCCs (II). DAPI was used for nuclear counterstaining. (E) qPCR analysis reveals loss of melanocytic markers in iPCCs compared with their parental melanoma cell lines. Gene expression levels were normalized to *GAPDH*. Error bars indicate 95% confidence intervals. p Values were calculated from three independent experiments by two-tailed, unpaired sample t test. Asterisk indicates t test p value of ≤ 0.05 in comparison with the respective reference (\*p ≤ 0.05, \*\*p ≤ 0.01, \*\*\*p ≤ 0.005).

(F) *NANOG* expression analyzed by qPCR in HT-144-iPCCs at indicated time points after doxycycline withdrawal compared with the parental HT-144. Nanog expression was normalized to internal *GAPDH*. Error bars indicate 95% confidence intervals. Dotted line, normalization to day 0.

(G) Metastable melanoma iPCCs form teratomas in vivo showing tissue structures of mesodermal (I), ectodermal (II), and endodermal (III) origin. Paraffin-embedded tumor slices were stained with H&E. See also Figure S1.

Ki67 was present in distinct tissue structures but was rarely expressed in the tumor mass.

### iPCCs Can Be Terminally Differentiated into Different Cell Lineages

Next, we assessed whether iPCCs can be terminally differentiated in vitro into cell lineages different from

that of the parental cells. We applied a previously published neuronal differentiation strategy based on dual SMAD inhibition using small molecules inhibiting SMAD and GSK3β signaling (Figure 4A) in combination with a low dose of Noggin and the bone morphogenetic protein (BMP) inhibitor LDN-193189 (Chambers et al., 2009; Ladewig et al., 2012). Within 3 days after induction of

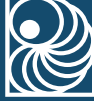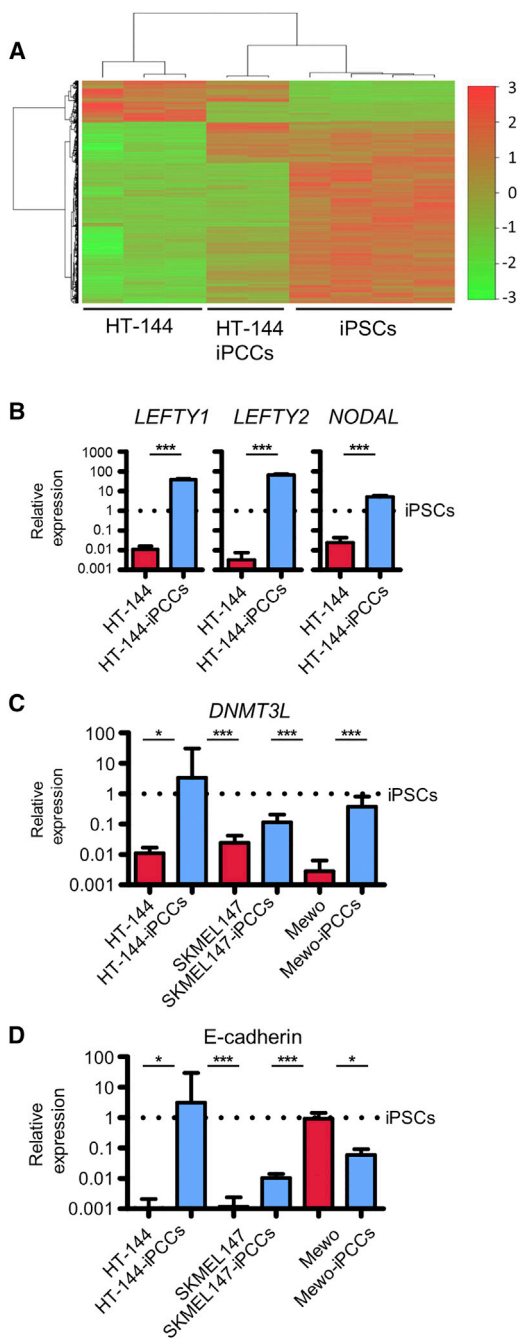

**Figure 2. Characterization of Melanoma iPCCs**

(A) Heatmap and dendrogram generated by unsupervised hierarchical clustering of differentially regulated genes (empirical Bayes moderated t test,  $p < 0.05$ ) in HT-144, HT-144-iPCCs, and hiPSCs. Red indicates increased expression and green decreased expression relative to the control.

(B–D) qPCR analysis of melanoma iPCCs compared with their reprogrammed progeny. iPSCs were used as reference sample. Data were obtained from three independent experiments. (B) Expression analysis of development-associated TGF- $\beta$  superfamily members *NODAL*, *LEFTY1*, and *LEFTY2*. (C) Expression analysis of the epige-

netic modifier *DNMT3L*. (D) Expression analysis of the MET marker *E-cadherin*. *GAPDH* was used as endogenous control and hiPSCs as reference sample. Error bars indicate 95% confidence intervals. Indicated is the mean + SD. p Values were calculated by two-tailed, unpaired sample t test. Asterisk indicates t test p value of  $\leq 0.05$  in comparison with the respective reference ( $***p \leq 0.005$ ).

neural differentiation, the first axon-like structures appeared and elongated with continued differentiation (Figure 4B). In accordance with the differentiation, pluripotency markers *NANOG* and *OCT4* were downregulated. Nevertheless, expression levels of both transcription factors were clearly higher than in the parental cell line, suggesting that the differentiation was not yet complete, although early neuronal markers such as microtubule-associated protein 2 (*MAP2*) and *PAX6* were increased. After 20–50 days, the late post-mitotic neuronal marker *RBFOX3* was significantly upregulated in HT-144-derived neuronal-like cells while parental HT-144 cells were negative for all neuronal markers (Figures 4C and 4D). Immunofluorescence staining of *TUJ1* in neuronal differentiated cells derived from HT-144-iPCCs constitutively expressing GFP confirmed the successful neuronal differentiation (Figure 4E).

### The Global Methylation Profile of iPCCs Resembles the Profiles of PSCs

Since iPCC-derived neuronal cells became post-mitotic, we applied a differentiation protocol that guided cells toward mesodermal lineage by stimulation with epidermal growth factor (EGF), insulin, and at later stages with additional BMP-4 (Figure 5A). Loss of melanoma and pluripotency markers indicated a non-melanocytic cell identity (Figure 5B). Due to the formation of spindle-like cells resembling normal human fibroblasts (NHFs) (Figure 5C), we named the cells HT-144-derived fibroblast-like cells (HT-144-dFLCs). These cells were clonally selected from two independent differentiations (HT-144-dFLCs-I and -II) and could be cultured for more than 40 passages.

To further assess the epigenetic similarities between the different cell types, we performed a global methylation analysis and grouped the cells according to their methylation status (Figures 5D and S4). Cells with a similar methylation profile clustered together in a multidimensional scale. As expected, the melanoma cell lines formed one cluster, as well as iPCCs and differentiated progeny. Using published methylation data from human embryonic stem cells (hESCs) and hiPSCs, we showed that the iPCCs moved toward stable PSCs but formed a separate cluster, indicating that the majority of methylation sites showed a similar profile to that of the PSCs. In contrast, the methylation profile of HT-144-dFLCs was distinct from the profile of NHFs.



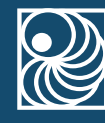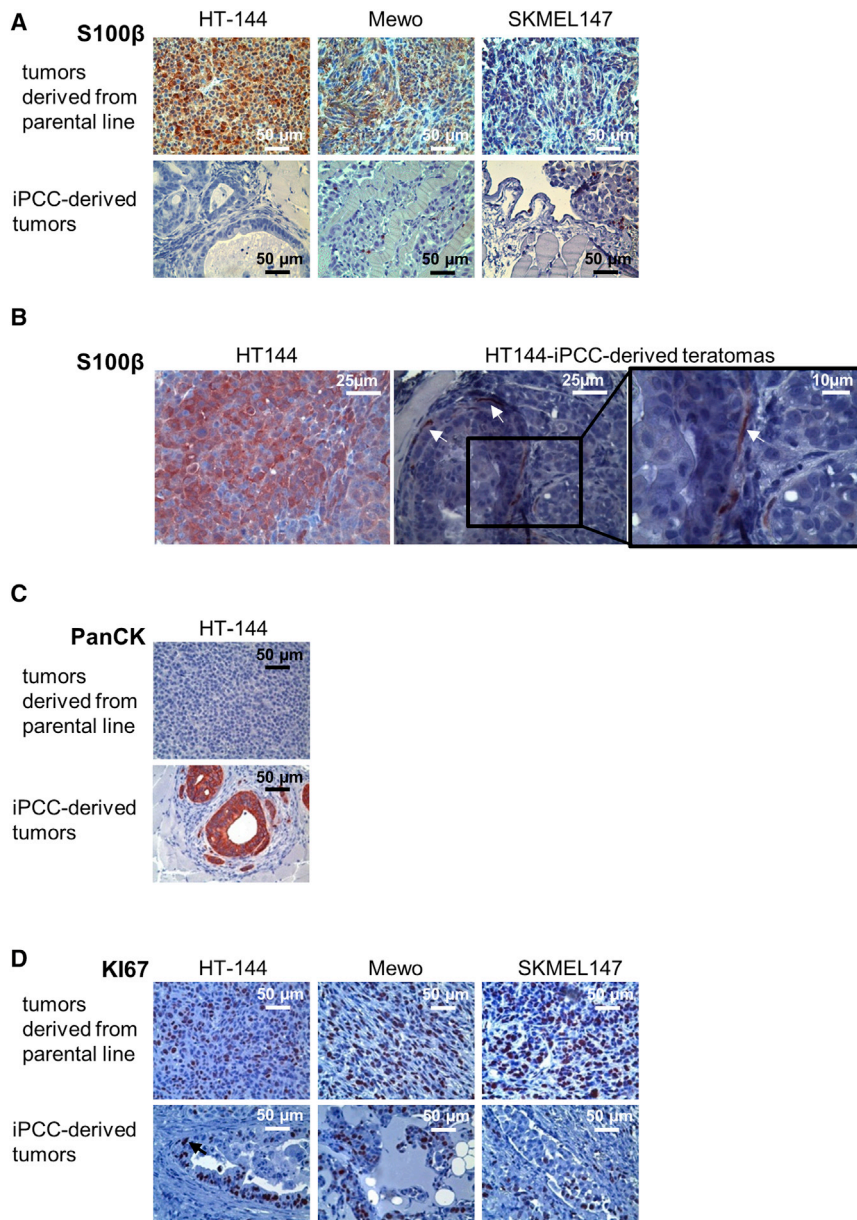

### Figure 3. Reduced Tumor Marker Expression in Reprogrammed Melanoma Cells

(A) Histological staining for the melanoma marker S100B in melanomas derived from HT-144, Mewo, and SKMEL147 cells and their respective reprogrammed progeny. (B) In contrast to melanomas, S100B expression is restricted to neuronal-like cells in HT-144-iPCC-derived teratomas (indicated by arrows). (C) Histological staining for epithelial cytokeratins (PanCK) in HT-144-iPCC-derived tumors and melanomas derived from the parental HT-144 cells. (D) Histological analysis of the expression of the proliferation marker KI67 in melanomas derived from HT-144, Mewo, and SKMEL147 cells and their respective reprogrammed progeny.

### iPCC-Derived Fibroblasts Show No Tumorigenic Potential

Previous publications demonstrated that reprogrammed tumor cells can acquire a non-tumorigenic phenotype (Uttikal et al., 2009; Stricker et al., 2013; Fehrenbach et al., 2016). Nevertheless, so far there is no evidence of how epigenetic modifications take shape in cells harboring constitutively active oncogenes. Therefore, we investigated the tumor-initiating potential of the parental cell line and HT-144-dFLC-II by subcutaneous injection in NSG mice. We observed no tumor formation in any of the HT-144-dFLC-II injected animals over a time period of 18 weeks. In contrast, all mice injected with the parental cells were

ethanized after 5.5 weeks because of the formation of large tumors (Figure 5E).

### iPCCs and iPCC-Derived Fibroblasts Lose Their Oncogene Addiction

It has recently been demonstrated that malignant leukemia cells lose their oncogene dependence by nuclear reprogramming into iPSCs (Carette et al., 2010). Due to the activating V600E mutation in HT-144 cells as a key driver of melanoma initiation and progression, we focused on MAPK signaling before and after the reprogramming process. Previous data demonstrated that the reprogramming process selects for cells harboring a low mutational load

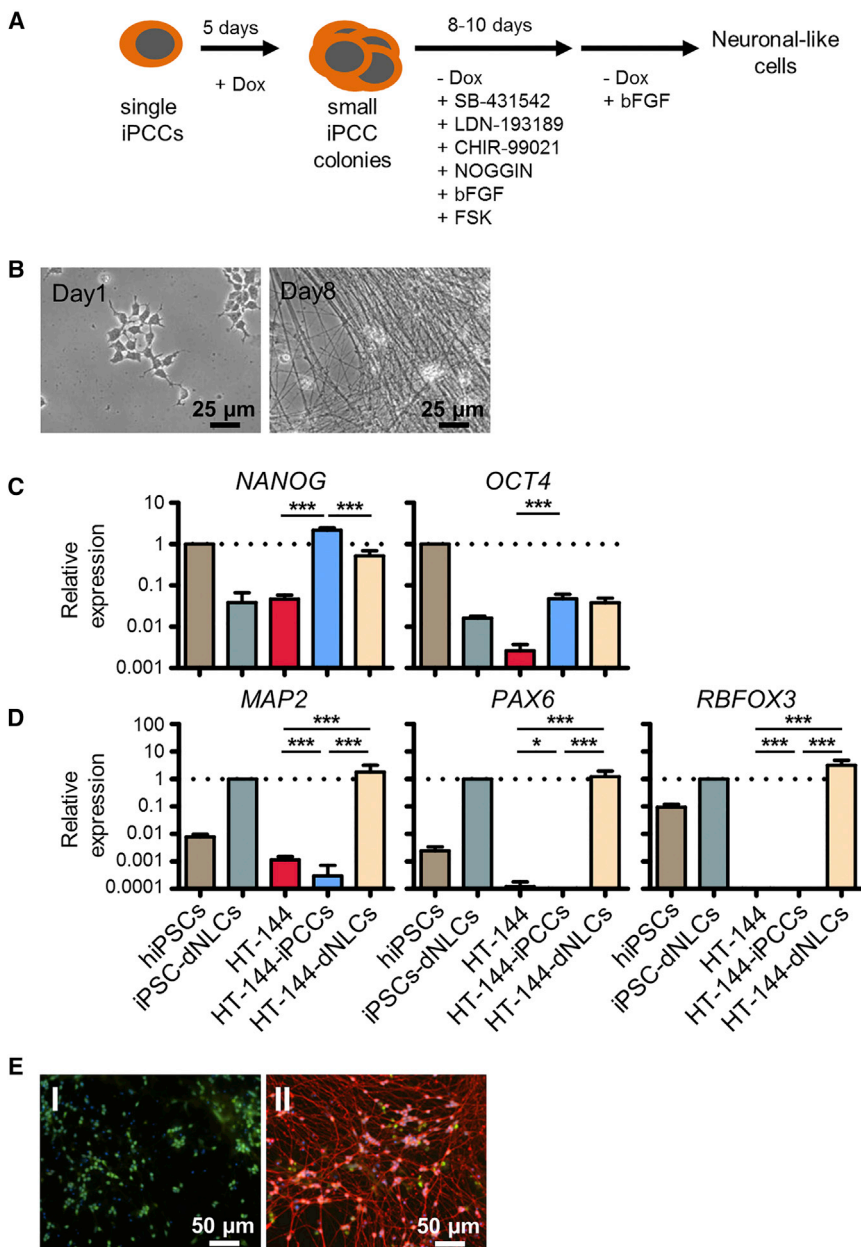

#### Figure 4. HT-144-iPCCs Efficiently Differentiate into Neuronal Cells

(A) Schematic illustration of the neuronal differentiation protocol.

(B) Morphology of HT-144-iPCCs subjected to neuronal induction at indicated time points.

(C and D) qPCR analysis of pluripotency marker (C) as well as early and late neuronal marker expression (D). Data were pooled from three independent experiments. *NANOG* and *OCT4* were normalized to hiPSCs. The neuronal markers *MAP2*, *PAX6*, and *RBFOX3* were normalized to hiPSC-derived neuronal cells. *GAPDH* served as internal control. Error bars indicate 95% confidence intervals. p Values were calculated by two-tailed, unpaired sample t test. Asterisk indicates t test p value of  $\leq 0.05$  in comparison with the respective reference (\*\*\*)  $p \leq 0.005$ .

(E) Immunofluorescence staining of B3-tubulin in HT-144-iPCCs (I) and iPCC-derived neuronal cells (II). iPCCs used for the staining constitutively express GFP.

(Lai et al., 2013). Therefore, as a first step we confirmed that all HT-144-derived cells harbored the *BRAF*<sup>V600E</sup> mutation (Figure 6A) using *BRAF*<sup>V600E</sup>-specific primers. Moreover, we found that the *BRAF*<sup>V600E</sup>-mutated HT-144, HT-144-iPCCs, and HT-144-dFLCs showed a methylation profile similar to that of the *BRAF* locus (Figure 6B). In line with this, we found high levels of phosphorylated ERK in all three cell types (Figure 6C). These results indicate that reprogramming of *BRAF*<sup>V600E</sup>-positive melanoma cells and in vitro differentiation of the iPCCs lead neither to the loss of the oncogene mutation nor to an epigenetic remodeling process that silences the gene. Fluorescence in situ hy-

bridization (FISH) analysis also shows no gain or loss of gene copy numbers related to genes of the BRAF-MEK-ERK signaling pathway (Figure 6D). However, in vivo differentiation of HT-144-iPCCs generated tumors containing structures without ERK activity (Figure 6E), suggesting that MAPK activity is restricted to cells of a specific tissue type.

Next, we investigated the response of reprogrammed melanoma cells and differentiated daughter cells to targeted melanoma therapies. Parental melanoma cells and the reprogrammed iPCCs were treated with 1  $\mu$ M of the MEK inhibitor trametinib and with the oncogene-specific

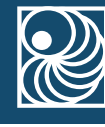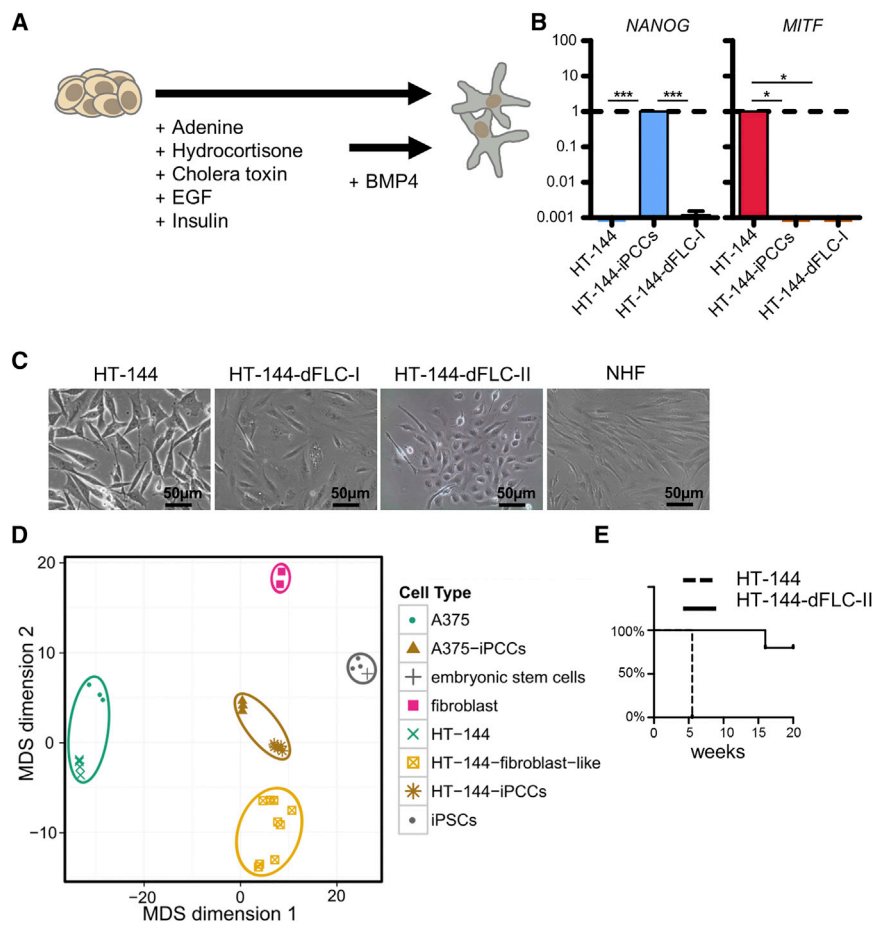

**Figure 5. Melanoma iPCCs Gain the Potential to Terminally Differentiate into Non-tumorigenic Cells**

(A) Schematic protocol for the differentiation of iPCC-derived fibroblast-like cells.

(B) qPCR analysis of *NANOG* and *MITF* expression in HT-144, reprogrammed HT-144-iPCCs, and iPCC-derived fibroblast-like cells (HT-144-dFLC-I). *GAPDH* served as endogenous control. Error bars indicate 95% confidence intervals. p Values were calculated from three independent experiments by two-tailed, unpaired sample t test. Asterisk indicates t test p value of  $\leq 0.05$  in comparison with the respective reference (\* $p \leq 0.05$ , \*\*\* $p \leq 0.005$ ).

(C) Morphological comparison of the parental cell line HT-144 and fibroblast-like cells from two differentiations (HT-144-dFLC) with NHFs.

(D) Global methylation profiles of A375 and HT-144 compared with the profiles of their respective iPCCs and HT-144-iPCC-derived fibroblast-like cells from three independent differentiations were used for a multidimensional scaling. Human fibroblasts (pink squares represent preparations from two different individuals), hiPSCs, and a publicly available dataset of hESCs were added as controls.

(E) Survival of mice after subcutaneous injection of  $1 \times 10^6$  parental HT-144 melanoma cells or HT-144-iPCC-derived

fibroblasts, respectively. Parental HT-144 melanoma cells gave rise to tumors in all five cases while no tumor growth was observed in five mice injected with HT-144-dFLC-II even after 20 weeks (one mouse was euthanized for other reasons).

BRAF inhibitor vemurafenib. Treatment with trametinib reduced cell proliferation in all melanoma cell lines and resulted in the appearance of floating, dead cells. In accordance with their mutational status, HT-144 cells were sensitive to vemurafenib treatment, unlike the *BRAF* wild-type cell lines Mewo and SKMEL147. Compared with the parental cell lines, iPCCs showed increased therapy resistance against MAPK inhibition without affecting the expression of the pluripotency marker alkaline phosphatase (Figure 6F).

To exclude that the ectopic expression of the pluripotency factors facilitates the therapy resistance, we investigated the therapy response in HT-144-dFLCs. Concentrations of 1,000 nM trametinib and 100 nM vemurafenib, which effectively killed HT-144 melanoma cells, showed no significant effect on HT-144-dFLCs (Figures 6G and S5). These data suggest that despite the presence of the mutated oncogene and its signaling activity, epigenetic modifications can facilitate a loss of oncogene addiction, which in turn results in resistance to targeted therapies.

## DISCUSSION

Here, we present a method to induce a pluripotent-like state even in tumor cells with a high mutational load. Melanoma cells harboring *BRAF*<sup>V600E</sup> or *NRAS* mutations were amenable to reprogramming similarly to wild-type cells. In contrast to the “classical” reprogramming protocol, we constitutively overexpressed OCT4, SOX2, and KLF4 and cultivated the cells similar to mESCs in the presence of human LIF on dense feeder cells. Previous studies in fibroblasts described similar murine-like ESCs upon ectopic expression of OCT4, SOX2, KLF4, MYC, and NANOG when supplemented with LIF. Like our iPCCs, these cells formed tightly packed colonies and could not stabilize the maintenance of the pluripotent state (Buecker et al., 2010). In contrast to our study, those cells did not reactivate the expression of endogenous pluripotency markers. Recently it was demonstrated that ectopic expression of reprogramming factors can generate an alternative NANOG-positive cell state. Although these so-called F-class cells



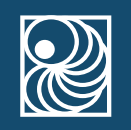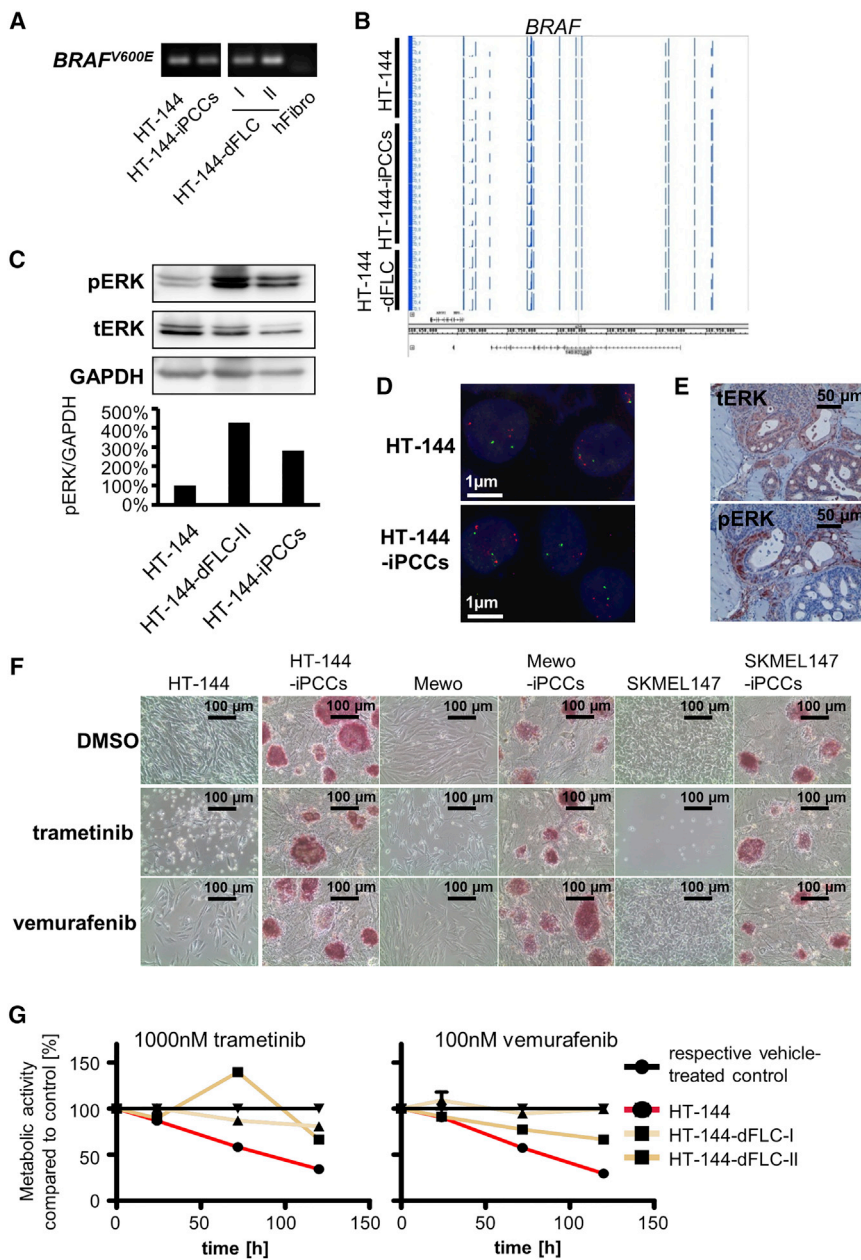

**Figure 6. Epigenetic Modifications Induced by Nuclear Reprogramming Lead to Therapy Resistance against MAPK Inhibitors in Melanoma Cells**

(A) Oncogene-specific PCR analysis of *BRAF*<sup>V600E</sup> in the parental HT-144 cells, HT-144-iPCCs, and iPCC-derived fibroblast-like cells. Human fibroblasts were used as a negative control.

(B) Methylation analysis of the *BRAF* locus in HT-144, HT-144-iPCCs, and HT-144-dFLCs.

(C) ERK activity in reprogrammed HT-144-iPCCs and fibroblast-like cells compared with the parental cell line determined by western blot analysis of phosphorylated ERK. GAPDH was used as an internal reference control for semi-quantitative protein analysis.

(D) FISH of HT144 and HT144-iPCCs shows no gain or loss of gene copy numbers related to genes of the BRAF-MEK-ERK signaling pathway such as *BRAF* (shown are nuclei with signals for the *BRAF* gene locus [red] and a centromeric reference gene probe [green]).

(E) HT-144-iPCCs give rise to tumors with reduced ERK activity in distinct differentiated structures. Histological staining of total ERK (tERK) and phosphorylated ERK (pERK) in HT-144-iPCC-derived tumors.

(F) Treatment of parental melanoma cells and their reprogrammed counterparts with the MEK inhibitor trametinib and the *BRAF*<sup>V600E</sup>-specific inhibitor vemurafenib.

(G) Therapy response of MAPK inhibitor-treated HT-144 and two fibroblast-like in vitro differentiations. Cells were incubated with 1,000 nM trametinib and 100 nM vemurafenib and analyzed for their metabolic activity at indicated time points.

See also [Figure S5](#).

share many features with our iPCCs in terms of gene expression and transgene dependence, F-class cells did not undergo mesenchymal-to-epithelial transition (MET) (Tonge et al., 2014), an early event during the reprogramming progress (Li et al., 2010; Samavarchi-Tehrani et al., 2010). On a molecular level, the successfully completed MET manifests itself by an upregulation of E-cadherin (Chen et al., 2010). This indicates that iPSC-like tumor cells generated in this study proceeded further in the reprogramming process than the F-class cells (Figure 2D). Similarly to early reports, we found that endogenous expression of re-

programming genes can compensate for ectopic expression (Utikal et al., 2009; Montserrat et al., 2012). This allowed us to reprogram the melanoma cells with OCT4, SOX2, and KLF4 only, without using the oncoprotein MYC.

A defined pattern of epigenetic signatures determines a cellular fate. Nuclear reprogramming allows us to reset a cell's specific profile of epigenetic marks to direct its cell fate using differentiation protocols. Resetting the epigenetic profile of melanoma cells into a pluripotent-like state facilitated the differentiation of melanoma iPCCs into terminally differentiated cells. Although all melanoma



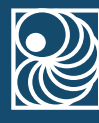

cell lines investigated in this study were sensitive to MEK inhibition and in the case of HT-144 additionally to BRAF inhibition, their respective melanoma iPCCs as well as iPCC-derived in vitro differentiations lost their oncogene dependence, indicated by the resistance to targeted therapy. The same phenomenon was observed in reprogrammed human myeloid leukemia cells, which lost their dependence on the *BCR-ABL* oncogene upon reprogramming or after terminal differentiation into non-hematopoietic lineages (Carette et al., 2010; Kumano et al., 2012).

Reprogramming toward pluripotency induces a stepwise increase in the developmental potential. This allows tumor cells to acquire a terminal differentiation other than its origin (Zhang et al., 2013). Fully reprogrammed murine R545 melanoma cells even gained the potential to give rise to a viable mouse (Utikal et al., 2009). Accordingly, we observed that *BRAF* mutant melanoma iPCCs can be differentiated into neurons and fibroblast-like cells in vitro. In vivo, the majority of iPCC-derived tumors did not contain melanoma cells. In contrast to our results, other studies showed that reprogrammed pluripotent cells tend to differentiate into the cell type of their origin. Reprogrammed pancreatic cancer cells predominately differentiate into pancreatic tissue, recapitulating early and late events of carcinoma development (Kim et al., 2013). This phenomenon is based on epigenetically anchored marks that generate an epigenetic memory (Bar-Nur et al., 2011; Kim et al., 2011). Here, we did not observe that the melanoma-derived iPCCs preferentially differentiate into a melanocytic lineage in vivo. Furthermore, no differences between Mewo-iPCCs, lacking *BRAF* or *NRAS* mutations, and other melanoma iPCCs, harboring mutations in members of the MAPK signaling, were observed. These results suggest that mutations of components of the MAPK pathway do not interfere with the epigenetic memory and hence do not influence differentiation toward the melanocytic lineage.

One major drawback of current melanoma therapy is the development of resistance mechanisms against novel therapeutics targeting the MAPK members RAF or MEK. Upon MAPK inhibition, additionally acquired mutations reactivate the MAPK pathway by gain of *RAF* gene copy numbers (Shi et al., 2012; Villanueva et al., 2013), and mutations in *RAS* (Poulikakos et al., 2011) or receptor tyrosine kinases (Nazarian et al., 2010), leading to therapy resistance. However, recent data revealed that a considerable amount of resistant melanomas show no genomic but rather transcriptomic alterations as drivers of therapy resistance caused by epigenetic modifications (Hugo et al., 2015). Here, we demonstrated that epigenetic modifications in melanoma cells induced by nuclear reprogramming can lead to therapy resistance against BRAF and MEK inhibitors. This supports the notion that therapy response is

linked to the cellular differentiation state. A dedifferentiation of melanoma cells was already linked to the resistance to adoptive T cell therapy (Landsberg et al., 2012), indicating a clinical relevance of melanoma cell state for therapy outcome.

Global epigenetic remodeling processes are well-known hallmarks of tumor development and also play an important role in melanomagenesis (reviewed in Lee et al., 2014). Nevertheless, the vast majority of melanomas shares common mutational events. In most cases, mutations leading to constitutively active RAS or RAF molecules combined with loss of tumor suppressors are key drivers of melanomagenesis (Hodis et al., 2012). Thus, nuclear reprogramming provides a tool to study the influence of a tumor genome on tumorigenesis in the context of specific cellular differentiation states. In this study, melanoma cells harboring *BRAF* mutations lost their tumor-initiating potential during the reprogramming process. Furthermore, dedifferentiation of melanoma cells is assumed to enhance their malignant potential (Landsberg et al., 2012). Expression of single stem cell factors such as OCT4 or SOX2 increases melanoma stem cell properties, leading to a more aggressive tumor phenotype (Kumar et al., 2012; Santini et al., 2014; Weina et al., 2016). In contrast, the simultaneous expression of three pluripotency markers leading to a semi-stable pluripotent state reduces the tumor-initiating potential.

In the majority of melanomas, oncogenic mutations of genes of the MAPK pathway drive tumor development. The well-known *BRAF*<sup>V600E</sup> mutation is responsible for constitutively active BRAF leading to hyperactive MAPK signaling. Targeting the tumor-specific mutation with small molecules provided a breakthrough in melanoma therapy, although resistance mechanisms leading to disease relapse rapidly damped expectations. We demonstrated that melanoma cells can acquire a metastable pluripotent state independent of *BRAF* or *NRAS* mutations. The cells reactivate expression of endogenous pluripotency markers and show further characteristics of PSCs, such as the potential to generate teratomas after subcutaneous injection into the flanks of immunocompromised mice. Interestingly, OCT4 expression was not upregulated, which might prevent the acquisition of a stable pluripotent state. In accordance, reprogrammed tumor cells remained dependent on the ectopic overexpression of the reprogramming factors.

Here, we demonstrated that a melanoma genome could be reprogrammed into a metastable mESC-like state of pluripotency. We could also show that subsequent differentiation of these pluripotent cells toward the mesodermal lineage was consistent with significantly impaired tumorigenicity. Therefore, we demonstrated a direct correlation between the tumorigenic potential of a cancer cell and its differentiation status.



## EXPERIMENTAL PROCEDURES

### Ethics Statement

Experiments with primary human material were conducted with patients' informed consent and were approved by the Medical Ethics Committee of the Medical Faculty Mannheim, Heidelberg University. Animal experiments were approved by the Animal Experiments Committee.

### Cell Culture of Tumor Cells and Murine Embryonic Fibroblasts

The *BRAF*<sup>V600E</sup> mutant melanoma cell lines HT-144 and A375, the *BRAF*<sup>V600D</sup> mutant cell line WM266.4, the *NRAS* mutant cell line SK-MEL147, the *BRAF* and *NRAS* wild-type cell line Mewo, and murine embryonic fibroblasts were cultivated in DMEM (Gibco Life Technologies) with 4,500 mg/L glucose and 4 mM L-alanyl-L-glutamine supplemented with 10% (v/v) heat-inactivated fetal bovine serum (Biocrom), 1% (v/v) 100× non-essential amino acids (NEAA; Sigma-Aldrich), 100 units/mL penicillin (Sigma-Aldrich), 100 µg/mL streptomycin (Sigma-Aldrich), and 0.1 mM 2-mercaptoethanol (Gibco Life Technologies). When 80% confluence was reached, cells were passaged using a 21-mM trypsin solution (Sigma-Aldrich). All cells were grown in a humidified atmosphere at 37°C and 5% CO<sub>2</sub>. Trametinib and vemurafenib (both Selleck Chemicals) were dissolved in DMSO (Carl Roth) and administered as indicated.

### Generation of iPSCs and iPCCs

For reprogramming of human tumor cells, fibroblasts and melanocytes (10<sup>5</sup> cells per cm<sup>2</sup>) were seeded on gelatin-coated plates and transduced with FUDeltaGW-rtTA-zeocin. Cells were selected with 100 µg/mL zeocin (Invivogen) in complete medium and then co-infected with tetO-hSTEMCCA-puro-loxP encoding for OCT4, SOX2, KLF4, and a puromycin resistance gene or alternatively with tetO-hSTEMCCA-loxP encoding for OCT4, SOX2, KLF4, and MYC. The next day, superinfection was performed to reach higher efficiencies. All transductions were conducted for 24 hr at 37°C in DMEM supplemented with 10 µg/mL polybrene (Sigma-Aldrich). Twenty-four hours after the last infection, 10<sup>5</sup> cells in complete medium were plated onto 6-well plates coated with gelatin. After the cells attached, doxycycline (Sigma-Aldrich) was added to the medium to induce transgene expression. From here on the medium was changed every second day. After 30–40 days the first colony-forming cells originated. To create reprogrammed clones derived from single cells, we manually transferred individual colonies onto fresh feeder cells in DMEM/F12 (Gibco Life Technologies) with 20% (v/v) knockout serum replacement (KOSR) (Gibco Life Technologies), 2 mM L-glutamine (Sigma-Aldrich), 1% (v/v) NEAA, 100 units/mL penicillin, 100 µg/mL streptomycin, 0.1 mM 2-mercaptoethanol, and 1 µg/mL doxycycline, supplemented with 10 ng/mL human LIF (Sigma-Aldrich).

### Human iPSC Culture

Stable clones of human iPSCs were cultivated under xeno-free cell-culture conditions using a synthetic surface matrix. One day in advance, 6-well plates were coated with Matrigel (Stemgent) for 1 hr at room temperature and stored at 4°C. Human iPSCs were

washed and undifferentiated parts were manually dissociated into cell clusters of 50–100 cells. These small cell aggregates were transferred to Matrigel-coated plates in mTeSR1 medium (STEMCELL Technologies) containing 20% (v/v) mTeSR1 supplements of BSA, recombinant human basic fibroblast growth factor (bFGF), recombinant human TGF-β, lithium chloride, pipercolic acid, and G-aminobutyric acid (STEMCELL Technologies). Every other day medium was changed and the differentiated parts manually removed. Alternatively, human iPSCs were cultivated on feeder cells in human ES medium, which consists of DMEM/F12 supplemented with 20% (v/v) KOSR, 2 mM L-glutamine, 1% (v/v) NEAA, 100 units/mL penicillin, 100 µg/mL streptomycin, 0.1 mM 2-mercaptoethanol, and 10 ng/mL bFGF (Promokine).

### Culture of Human iPCCs

Growth-arrested feeder cells were plated on gelatin-coated 6-well plates in complete medium and incubated for 2 days to ensure proper attachment and spread. iPCCs were then transferred onto feeder cells and medium was changed to DMEM/F12 with 20% (v/v) KOSR, 2 mM L-glutamine, 1% (v/v) NEAA, 100 units/mL penicillin, 100 µg/mL streptomycin, 0.1 mM 2-mercaptoethanol, and 1 µg/mL doxycycline, supplemented with 10 ng/mL human LIF. For passaging, cells were harvested every 4–7 days using trypsin and replated at 1:30 to 1:100 dilutions in medium containing 10 µM ROCK inhibitor (Y-27632, Stemgent). For separation of iPCCs from feeder cells by preplating, cells were harvested using trypsin, dissociated into single cells, washed, and resuspended in medium containing ROCK inhibitor. The cell suspension was then transferred onto gelatin-coated tissue culture plates and incubated for 2 hr at 37°C. Undifferentiated cells floating in the supernatant were collected and prepared for further experiments.

### Fibroblast Differentiation

For the differentiation into fibroblast-like cells, HT-144-iPCCs were seeded onto 80% confluent mitotically inactivated feeder cells in naive human ES medium with 10 µM ROCK inhibitor and 1 µg/mL doxycycline, and cultivated for 2–5 days until small colonies were formed. Different protocols were followed to establish the clones I–III. Clone I was generated by changing the medium to DMEM/F12 1:1 with Neurobasal medium (Gibco Life Technologies) containing 1% B27 (Gibco Life Technologies) and 0.5% (v/v) N2 supplement (Gibco Life Technologies) for 3 days. The medium was then also switched to complete medium with 20% (v/v) fetal calf serum (FCS). For clone II, iPCC colonies were cultivated in DMEM/F12 3:1 supplemented with 10% (v/v) FCS, 0.18 mM adenine (Sigma-Aldrich), 0.5 µg/mL hydrocortisone (Sigma-Aldrich), 100 pM cholera toxin (Sigma-Aldrich), 10 ng/mL EGF (Gibco Life Technologies), and 5 µg/mL insulin (Sigma-Aldrich) for 10 days and supplemented on days 4–10 with 0.5 nM BMP-4 (Promokine). Afterward, fibroblast-like cells were split and maintained in T75 cell-culture flasks with complete medium.

### Neuronal Differentiation

For neuronal induction, 2 × 10<sup>4</sup> cells per cm<sup>2</sup> were seeded on Matrigel-coated dishes in DMEM/F12 with 20% (v/v) KOSR, 2 mM L-glutamine, 1% (v/v) NEAA, 100 units/mL penicillin, 100 µg/mL streptomycin, 0.1 mM 2-mercaptoethanol, and



1  $\mu\text{g}/\text{mL}$  doxycycline, supplemented with 10 ng/mL human LIF and 10  $\mu\text{M}$  ROCK inhibitor. When small colonies of five to ten cells appeared, medium was changed to DMEM/F12 and Neurobasal mixed at a 1:1 ratio with 1% (v/v) B27 and 0.5% (v/v) N2, 100 ng/mL Noggin (R&D Systems), 0.5  $\mu\text{M}$  LDN-193189 (Stemgent), 10  $\mu\text{M}$  SB-431542 (Tocris), 2  $\mu\text{M}$  CHIR-99021 (Selleckchem), 10  $\mu\text{M}$  forskolin (Tocris), and 10 ng/mL bFGF for 3–10 days. Then, cells were cultivated for an additional 5–10 days without small compound inhibitors but in the presence of 10 ng/mL bFGF.

### Methylation Array Analysis

Genome-wide methylation analysis using Illumina Infinium HumanMethylation450 BeadChips according to the manufacturer's instructions was performed at the German Cancer Research Center (DKFZ) Genomics and Proteomics Core Facility. The data discussed in this publication have been deposited in the NCBI GEO (Edgar et al., 2002) and are accessible through series accession number GEO: GSE95816 (<https://www.ncbi.nlm.nih.gov/geo/query/acc.cgi?acc=GSE95816>). Raw-intensity data files of the following publicly available HumanMethylation450 samples from the ENCODE project (Kellis et al., 2014) were downloaded from <http://www.encodeproject.org>: ENCBS111ENC. The software RnBeads (Assenov et al., 2014) was used for quality assessment, normalization, dimension reduction, and other analyses of the combined dataset.

### Cell Viability Assay

Cell viability was analyzed using the alamarBlue Cell viability assay (Thermo Fisher Scientific). Cells were plated in black 96-well plates in phenol-free DMEM (Gibco Life Technologies). After 24 hr at 37°C, 100  $\mu\text{L}$  of medium was added and supplemented with DMSO or inhibitors for final concentrations ranging from 1 nM to 1  $\mu\text{M}$ . At indicated time points 1/10 alamarBlue was added followed by fluorescence measurement 2–4 hr later at 37°C using a SpectraMax M5 microplate reader with an excitation wavelength of 540 nm and an emission wavelength of 590 nm. Cell viability was calculated from the resulting change in fluorescence intensity normalized to cells exposed to vehicle only.

### Animal Experiments

For analysis of tumor initiation and in vivo differentiation potential,  $1 \times 10^6$  cells were resuspended in 50% Matrigel and subcutaneously injected in either NOD/SCID mice or NSG mice according to the German Animal Protection Law. Mice were euthanized and developing tumors were isolated when reaching the size of 1 cm in diameter.

### ACCESSION NUMBERS

The accession number for the gene expression data reported in this paper is GEO: GSE95281. The accession number for the methylation data reported in this paper is GEO: GSE95816.

### SUPPLEMENTAL INFORMATION

Supplemental Information includes Supplemental Experimental Procedures and five figures and can be found with this article online at <http://dx.doi.org/10.1016/j.stemcr.2017.03.007>.

### AUTHOR CONTRIBUTIONS

Conception and Design: M.B., N.K., K.W., and J.U.; Collection and/or Assembly of Data: M.B., D.N., E.O., M.R., and J.U.; Data Analysis and Interpretation: M.B., Y.A., L.L., C.G., C.P., V.U., and J.U.; Provision of Study Material or Patients: J.U.; Manuscript writing: M.B., D.N., N.K., and J.U.; Final approval of manuscript: M.B., D.N., Y.A., E.O., N.K., K.W., M.R., L.L., C.G., C.P., V.U., and J.U.; Financial support: J.U.; Administrative support: J.U.

### ACKNOWLEDGMENTS

The authors thank Daniel Roth, Jennifer Dworacek, and Sayran Arif-Said for excellent technical assistance. We thank the Genomics & Proteomics Core Facility and the Imaging and Cytometry Core facility of the DKFZ for expression profiling and provision of FACS devices. This work was supported by a grant from the German Cancer Aid (Max-Eder Research Group, no. 784395, to J.U.).

Received: November 29, 2016

Revised: March 8, 2017

Accepted: March 9, 2017

Published: April 6, 2017

### REFERENCES

- Assenov, Y., Müller, F., Lutsik, P., Walter, J., Lengauer, T., and Bock, C. (2014). Comprehensive analysis of DNA methylation data with RnBeads. *Nat. Methods* 11, 1138–1140.
- Bar-Nur, O., Russ, H.A., Efrat, S., and Benvenisty, N. (2011). Epigenetic memory and preferential lineage-specific differentiation in induced pluripotent stem cells derived from human pancreatic islet beta cells. *Cell Stem Cell* 9, 17–23.
- Bartholomeusz, G., Talpaz, M., Bornmann, W., Kong, L.Y., and Donato, N.J. (2007). Degrasyn activates proteasomal-dependent degradation of c-Myc. *Cancer Res.* 67, 3912–3918.
- Bernhardt, M., Galach, M., Novak, D., and Utikal, J. (2012). Mediators of induced pluripotency and their role in cancer cells—current scientific knowledge and future perspectives. *Biotechnol. J.* 7, 810–821.
- Buecker, C., Chen, H.H., Polo, J.M., Daheron, L., Bu, L., Barakat, T.S., Okwieka, P., Porter, A., Gribnau, J., Hochedlinger, K., et al. (2010). A murine ESC-like state facilitates transgenesis and homologous recombination in human pluripotent stem cells. *Cell Stem Cell* 6, 535–546.
- Cappellen, D., Schlange, T., Bauer, M., Maurer, F., and Hynes, N.E. (2007). Novel c-MYC target genes mediate differential effects on cell proliferation and migration. *EMBO Rep.* 8, 70–76.
- Carette, J.E., Pruszak, J., Varadarajan, M., Blomen, V.A., Gokhale, S., Camargo, F.D., Wernig, M., Jaenisch, R., and Brummelkamp, T.R. (2010). Generation of iPSCs from cultured human malignant cells. *Blood* 115, 4039–4042.
- Chambers, S.M., Fasano, C.A., Papapetrou, E.P., Tomishima, M., Sadelain, M., and Studer, L. (2009). Highly efficient neural conversion of human ES and iPS cells by dual inhibition of SMAD signaling. *Nat. Biotechnol.* 27, 275–280.





- Chen, T., Yuan, D., Wei, B., Jiang, J., Kang, J., Ling, K., Gu, Y., Li, J., Xiao, L., and Pei, G. (2010). E-cadherin-mediated cell-cell contact is critical for induced pluripotent stem cell generation. *Stem Cells* 28, 1315–1325.
- Di Ruscio, A., Patti, F., Welner, R.S., Tenen, D.G., and Amabile, G. (2015). Multiple sclerosis: getting personal with induced pluripotent stem cells. *Cell Death Dis.* 6, e1806.
- Edgar, R., Domrachev, M., and Lash, A.E. (2002). Gene Expression Omnibus: NCBI gene expression and hybridization array data repository. *Nucleic Acids Res.* 30, 207–210.
- Fehrenbach, S., Novak, D., Bernhardt, M., Larr이버, L., Boukamp, P., Umansky, V., and Utikal, J. (2016). Loss of tumorigenic potential upon transdifferentiation from keratinocytic into melanocytic lineage. *Sci. Rep.* 6, 28891.
- Galach, M., and Utikal, J. (2011). From skin to the treatment of diseases—the possibilities of iPSC cell research in dermatology. *Exp. Dermatol.* 20, 523–528.
- Hochedlinger, K., Blesloch, R., Brennan, C., Yamada, Y., Kim, M., Chin, L., and Jaenisch, R. (2004). Reprogramming of a melanoma genome by nuclear transplantation. *Genes Dev.* 18, 1875–1885.
- Hodis, E., Watson, I.R., Kryukov, G.V., Arold, S.T., Imielinski, M., Theurillat, J.P., Nickerson, E., Auclair, D., Li, L., Place, C., et al. (2012). A landscape of driver mutations in melanoma. *Cell* 150, 251–263.
- Hugo, W., Shi, H., Sun, L., Piva, M., Song, C., Kong, X., Moriceau, G., Hong, A., Dahlman, K.B., Johnson, D.B., et al. (2015). Non-genomic and immune evolution of melanoma acquiring MAPK1 resistance. *Cell* 162, 1271–1285.
- Japtok, J., Lojewski, X., Naumann, M., Klingenstein, M., Reinhardt, P., Sternecker, J., Putz, S., Demestre, M., Boeckers, T.M., Ludolph, A.C., et al. (2015). Stepwise acquirement of hallmark neuropathology in FUS-ALS iPSC models depends on mutation type and neuronal aging. *Neurobiol. Dis.* 82, 420–429.
- Kellis, M., Wold, B., Snyder, M.P., Bernstein, B.E., Kundaje, A., Marinov, G.K., Ward, L.D., Birney, E., Crawford, G.E., Dekker, J., et al. (2014). Defining functional DNA elements in the human genome. *Proc. Natl. Acad. Sci. USA* 111, 6131–6138.
- Kim, K., Doi, A., Wen, B., Ng, K., Zhao, R., Cahan, P., Kim, J., Aryee, M.J., Ji, H., Ehrlich, L.I., et al. (2010). Epigenetic memory in induced pluripotent stem cells. *Nature* 467, 285–290.
- Kim, K., Zhao, R., Doi, A., Ng, K., Unternaehrer, J., Cahan, P., Huo, H., Loh, Y.H., Aryee, M.J., Lensch, M.W., et al. (2011). Donor cell type can influence the epigenome and differentiation potential of human induced pluripotent stem cells. *Nat. Biotechnol.* 29, 1117–1119.
- Kim, J., Hoffman, J.P., Alpaugh, R.K., Rhim, A.D., Reichert, M., Stanger, B.Z., Furth, E.E., Sepulveda, A.R., Yuan, C.X., Won, K.J., et al. (2013). An iPSC line from human pancreatic ductal adenocarcinoma undergoes early to invasive stages of pancreatic cancer progression. *Cell Rep.* 3, 2088–2099.
- Kraehn, G.M., Utikal, J., Udart, M., Greulich, K.M., Bezold, G., Kasel, P., Leiter, U., and Peter, R.U. (2001). Extra c-myc oncogene copies in high risk cutaneous malignant melanoma and melanoma metastases. *Br. J. Cancer* 84, 72–79.
- Kumano, K., Arai, S., Hosoi, M., Taoka, K., Takayama, N., Otsu, M., Nagae, G., Ueda, K., Nakazaki, K., Kamikubo, Y., et al. (2012). Generation of induced pluripotent stem cells from primary chronic myelogenous leukemia patient samples. *Blood* 119, 6234–6242.
- Kumar, S.M., Liu, S., Lu, H., Zhang, H., Zhang, P.J., Gimotty, P.A., Guerra, M., Guo, W., and Xu, X. (2012). Acquired cancer stem cell phenotypes through Oct4-mediated dedifferentiation. *Oncogene* 31, 4898–4911.
- Ladewig, J., Mertens, J., Kesavan, J., Doerr, J., Poppe, D., Glaue, F., Herms, S., Wernet, P., Kögler, G., Müller, F.J., et al. (2012). Small molecules enable highly efficient neuronal conversion of human fibroblasts. *Nat. Methods* 9, 575–578.
- Lai, J., Kong, C.M., Mahalingam, D., Xie, X., and Wang, X. (2013). Elite model for the generation of induced pluripotent cancer cells (iPCs). *PLoS One* 8, e56702.
- Landsberg, J., Kohlmeyer, J., Renn, M., Bald, T., Rogava, M., Cron, M., Fatho, M., Lennerz, V., Wölfel, T., Hölzel, M., et al. (2012). Melanomas resist T-cell therapy through inflammation-induced reversible dedifferentiation. *Nature* 490, 412–416.
- Larr이버, L., and Utikal, J. (2014). De- and re-differentiation of the melanocytic lineage. *Eur. J. Cell Biol.* 93, 30–35.
- Lee, J.J., Murphy, G.F., and Lian, C.G. (2014). Melanoma epigenetics: novel mechanisms, markers, and medicines. *Lab. Invest.* 94, 822–838.
- Li, R., Liang, J., Ni, S., Zhou, T., Qing, X., Li, H., He, W., Chen, J., Li, F., Zhuang, Q., et al. (2010). A mesenchymal-to-epithelial transition initiates and is required for the nuclear reprogramming of mouse fibroblasts. *Cell Stem Cell* 7, 51–63.
- Lin, F.K., and Chui, Y.L. (2012). Generation of induced pluripotent stem cells from mouse cancer cells. *Cancer Biother. Radiopharm.* 27, 694–700.
- Liu, J., Han, Q., Peng, T., Peng, M., Wei, B., Li, D., Wang, X., Yu, S., Yang, J., Cao, S., et al. (2015). The oncogene c-Jun impedes somatic cell reprogramming. *Nat. Cell Biol.* 17, 856–867.
- Lojewski, X., Staropoli, J.F., Biswas-Légrand, S., Simas, A.M., Haliw, L., Selig, M.K., Coppel, S.H., Goss, K.A., Petcherski, A., Chandrachud, U., et al. (2014). Human iPSC models of neuronal ceroid lipofuscinosis capture distinct effects of TPP1 and CLN3 mutations on the endocytic pathway. *Hum. Mol. Genet.* 23, 2005–2022.
- Macville, M., Schröck, E., Padilla-Nash, H., Keck, C., Ghadimi, B.M., Zimonjic, D., Popescu, N., and Ried, T. (1999). Comprehensive and definitive molecular cytogenetic characterization of HeLa cells by spectral karyotyping. *Cancer Res.* 59, 141–150.
- Maherali, N., Sridharan, R., Xie, W., Utikal, J., Eminli, S., Arnold, K., Stadtfeld, M., Yachechko, R., Tchiew, J., Jaenisch, R., et al. (2007). Directly reprogrammed fibroblasts show global epigenetic remodeling and widespread tissue contribution. *Cell Stem Cell* 1, 55–70.
- Montserrat, N., Ramírez-Bajo, M.J., Xia, Y., Sancho-Martinez, I., Moya-Rull, D., Miquel-Serra, L., Yang, S., Nivet, E., Cortina, C., González, F., et al. (2012). Generation of induced pluripotent stem cells from human renal proximal tubular cells with only two transcription factors, OCT4 and SOX2. *J. Biol. Chem.* 287, 24131–24138.
- Nazarian, R., Shi, H., Wang, Q., Kong, X., Koya, R.C., Lee, H., Chen, Z., Lee, M.K., Attar, N., Sazegar, H., et al. (2010). Melanomas



- acquire resistance to B-RAF(V600E) inhibition by RTK or N-RAS up-regulation. *Nature* 468, 973–977.
- Nukaya, D., Minami, K., Hoshikawa, R., Yokoi, N., and Seino, S. (2015). Preferential gene expression and epigenetic memory of induced pluripotent stem cells derived from mouse pancreas. *Genes Cells* 20, 367–381.
- Poulikakos, P.I., Persaud, Y., Janakiraman, M., Kong, X., Ng, C., Moriceau, G., Shi, H., Atefi, M., Titz, B., Gabay, M.T., et al. (2011). RAF inhibitor resistance is mediated by dimerization of aberrantly spliced BRAF(V600E). *Nature* 480, 387–390.
- Samavarchi-Tehrani, P., Golipour, A., David, L., Sung, H.K., Beyer, T.A., Datti, A., Woltjen, K., Nagy, A., and Wrana, J.L. (2010). Functional genomics reveals a BMP-driven mesenchymal-to-epithelial transition in the initiation of somatic cell reprogramming. *Cell Stem Cell* 7, 64–77.
- Santini, R., Pietrobono, S., Pandolfi, S., Montagnani, V., D’Amico, M., Penachioni, J.Y., Vinci, M.C., Borgognoni, L., and Stecca, B. (2014). SOX2 regulates self-renewal and tumorigenicity of human melanoma-initiating cells. *Oncogene* 33, 4697–4708.
- Sarkar, D., Park, E.S., and Fisher, P.B. (2006). Defining the mechanism by which IFN-beta downregulates c-myc expression in human melanoma cells: pivotal role for human polynucleotide phosphorylase (hPNPaseold-35). *Cell Death Differ.* 13, 1541–1553.
- Shi, H., Moriceau, G., Kong, X., Lee, M.K., Lee, H., Koya, R.C., Ng, C., Chodon, T., Scolyer, R.A., Dahlman, K.B., et al. (2012). Melanoma whole-exome sequencing identifies (V600E)B-RAF amplification-mediated acquired B-RAF inhibitor resistance. *Nat. Commun.* 3, 724.
- Stanslowsky, N., Haase, A., Martin, U., Naujock, M., Leffler, A., Dengler, R., and Wegner, F. (2014). Functional differentiation of midbrain neurons from human cord blood-derived induced pluripotent stem cells. *Stem Cell Res. Ther.* 5, 35.
- Stricker, S.H., Feber, A., Engström, P.G., Carén, H., Kurian, K.M., Takashima, Y., Watts, C., Way, M., Dirks, P., Bertone, P., et al. (2013). Widespread resetting of DNA methylation in glioblastoma-initiating cells suppresses malignant cellular behavior in a lineage-dependent manner. *Genes Dev.* 27, 654–669.
- Tabar, V., and Studer, L. (2014). Pluripotent stem cells in regenerative medicine: challenges and recent progress. *Nat. Rev. Genet.* 15, 82–92.
- Takahashi, K., and Yamanaka, S. (2006). Induction of pluripotent stem cells from mouse embryonic and adult fibroblast cultures by defined factors. *Cell* 126, 663–676.
- Takahashi, K., Tanabe, K., Ohnuki, M., Narita, M., Ichisaka, T., Tomoda, K., and Yamanaka, S. (2007). Induction of pluripotent stem cells from adult human fibroblasts by defined factors. *Cell* 131, 861–872.
- Tonge, P.D., Corso, A.J., Monetti, C., Hussein, S.M., Puri, M.C., Michael, I.P., Li, M., Lee, D.S., Mar, J.C., Cloonan, N., et al. (2014). Divergent reprogramming routes lead to alternative stem-cell states. *Nature* 516, 192–197.
- Utikal, J., Maherali, N., Kulalert, W., and Hochedlinger, K. (2009). Sox2 is dispensable for the reprogramming of melanocytes and melanoma cells into induced pluripotent stem cells. *J. Cell Sci.* 122, 3502–3510.
- Villanueva, J., Infante, J.R., Krepler, C., Reyes-Urbe, P., Samanta, M., Chen, H.Y., Li, B., Swoboda, R.K., Wilson, M., Vultur, A., et al. (2013). Concurrent MEK2 mutation and BRAF amplification confer resistance to BRAF and MEK inhibitors in melanoma. *Cell Rep.* 4, 1090–1099.
- Weina, K., Wu, H., Knappe, N., Orouji, E., Novak, D., Bernhardt, M., Hüser, L., Larribère, L., Umansky, V., Gebhardt, C., et al. (2016). TGF- $\beta$  induces SOX2 expression in a time-dependent manner in human melanoma cells. *Pigment Cell Melanoma Res.* 29, 453–458.
- Yagi, T., Ito, D., Okada, Y., Akamatsu, W., Nihei, Y., Yoshizaki, T., Yamanaka, S., Okano, H., and Suzuki, N. (2011). Modeling familial Alzheimer’s disease with induced pluripotent stem cells. *Hum. Mol. Genet.* 20, 4530–4539.
- Zhang, X., Cruz, F.D., Terry, M., Remotti, F., and Matushansky, I. (2013). Terminal differentiation and loss of tumorigenicity of human cancers via pluripotency-based reprogramming. *Oncogene* 32, 2249–2260, 2260.e1–21.
- Zhuang, D., Mannava, S., Grachtchouk, V., Tang, W.H., Patil, S., Wawrzyniak, J.A., Berman, A.E., Giordano, T.J., Prochownik, E.V., Soengas, M.S., et al. (2008). C-MYC overexpression is required for continuous suppression of oncogene-induced senescence in melanoma cells. *Oncogene* 27, 6623–6634.

**Stem Cell Reports, Volume 8**

## **Supplemental Information**

### **Melanoma-Derived iPCCs Show Differential Tumorigenicity and Therapy Response**

**Mathias Bernhardt, Daniel Novak, Yassen Assenov, Elias Orouji, Nathalie Knappe, Kasia Weina, Maike Reith, Lionel Larribere, Christoffer Gebhardt, Christoph Plass, Viktor Umansky, and Jochen Utikal**



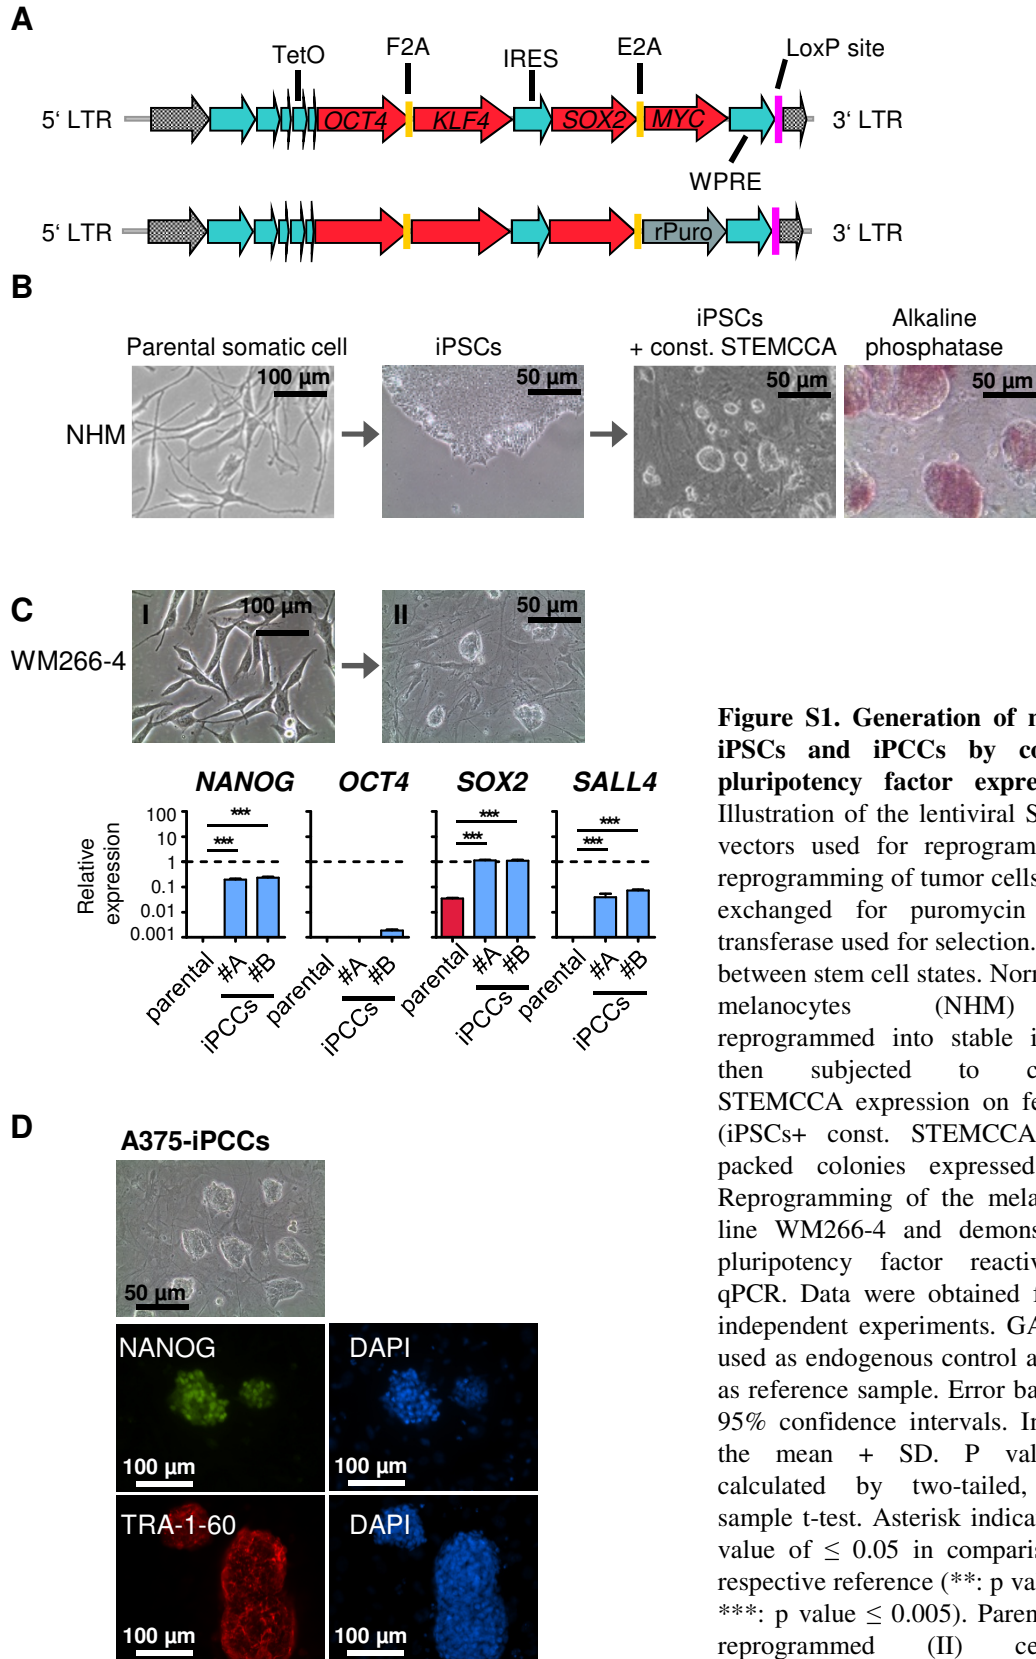

**Figure S1. Generation of metastable iPSCs and iPCCs by constitutive pluripotency factor expression.** **A)** Illustration of the lentiviral STEMCCA vectors used for reprogramming. For reprogramming of tumor cells *MYC* was exchanged for puromycin N-acetyltransferase used for selection. **B)** Switch between stem cell states. Normal human melanocytes (NHM) were reprogrammed into stable iPSCs and then subjected to constitutive STEMCCA expression on feeder cells (iPSCs+ const. STEMCCA). Tightly packed colonies expressed AP. **C)** Reprogramming of the melanoma cell line WM266-4 and demonstration of pluripotency factor reactivation by qPCR. Data were obtained from three independent experiments. GAPDH was used as endogenous control and hiPSCs as reference sample. Error bars indicate 95% confidence intervals. Indicated is the mean + SD. P values were calculated by two-tailed, unpaired sample t-test. Asterisk indicates t-test p value of  $\leq 0.05$  in comparison to the respective reference (\*\*: p value  $\leq 0.01$ ; \*\*\*: p value  $\leq 0.005$ ). Parental (I) and reprogrammed (II) cells. **D)** Characterization of reprogrammed A375 melanoma cells by morphological analysis and immunofluorescence staining of NANOG and TRA-1-60.

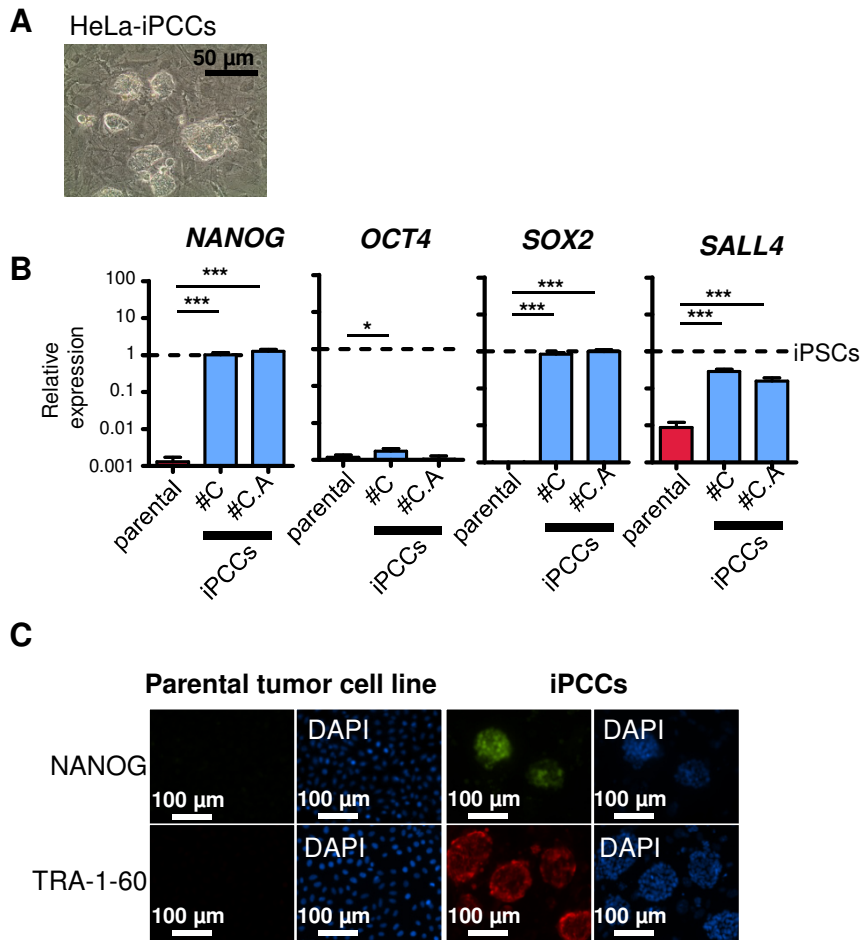

**Figure S2. Generation of iPCCs from the cervical carcinoma cell line HeLa.** **A)** Morphological characterization of HeLa-iPCCs. **B)** QPCR validation of the endogenous expression of the pluripotency markers *NANOG*, *OCT4*, *SOX2* and *SALL4*. Data were pooled from three independent experiments. GAPDH was used as endogenous control and hiPSCs as reference sample. Error bars indicate 95% confidence intervals. Indicated is the mean + SD. P values were calculated by two-tailed, unpaired sample t-test. Asterisk indicates t-test p value of  $\leq 0.05$  in comparison to the respective reference (\*\*: p value  $\leq 0.01$ ; \*\*\*: p value  $\leq 0.005$ ). **C)** Immunofluorescence staining of NANOG and TRA-1-60 in HeLa cells and HeLa-iPCCs. Nuclear counterstaining with DAPI as indicated.

Day 7

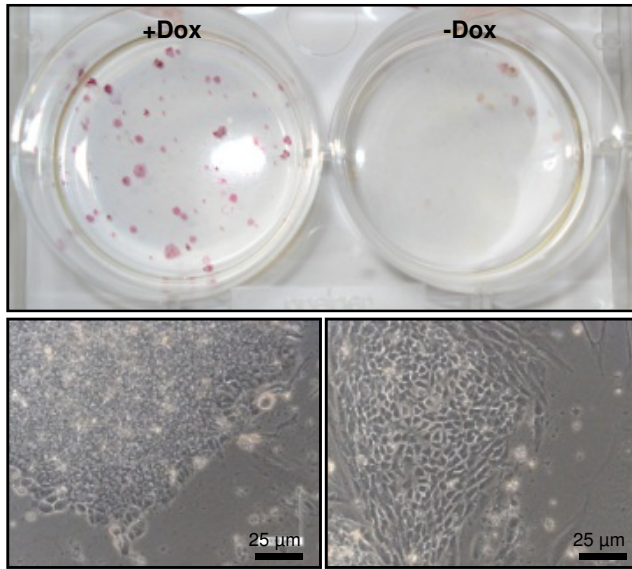

**Figure S3. Transgene-dependence of metastable iPCCs.** Doxycycline was withdrawn for 7 days followed by staining for AP activity.



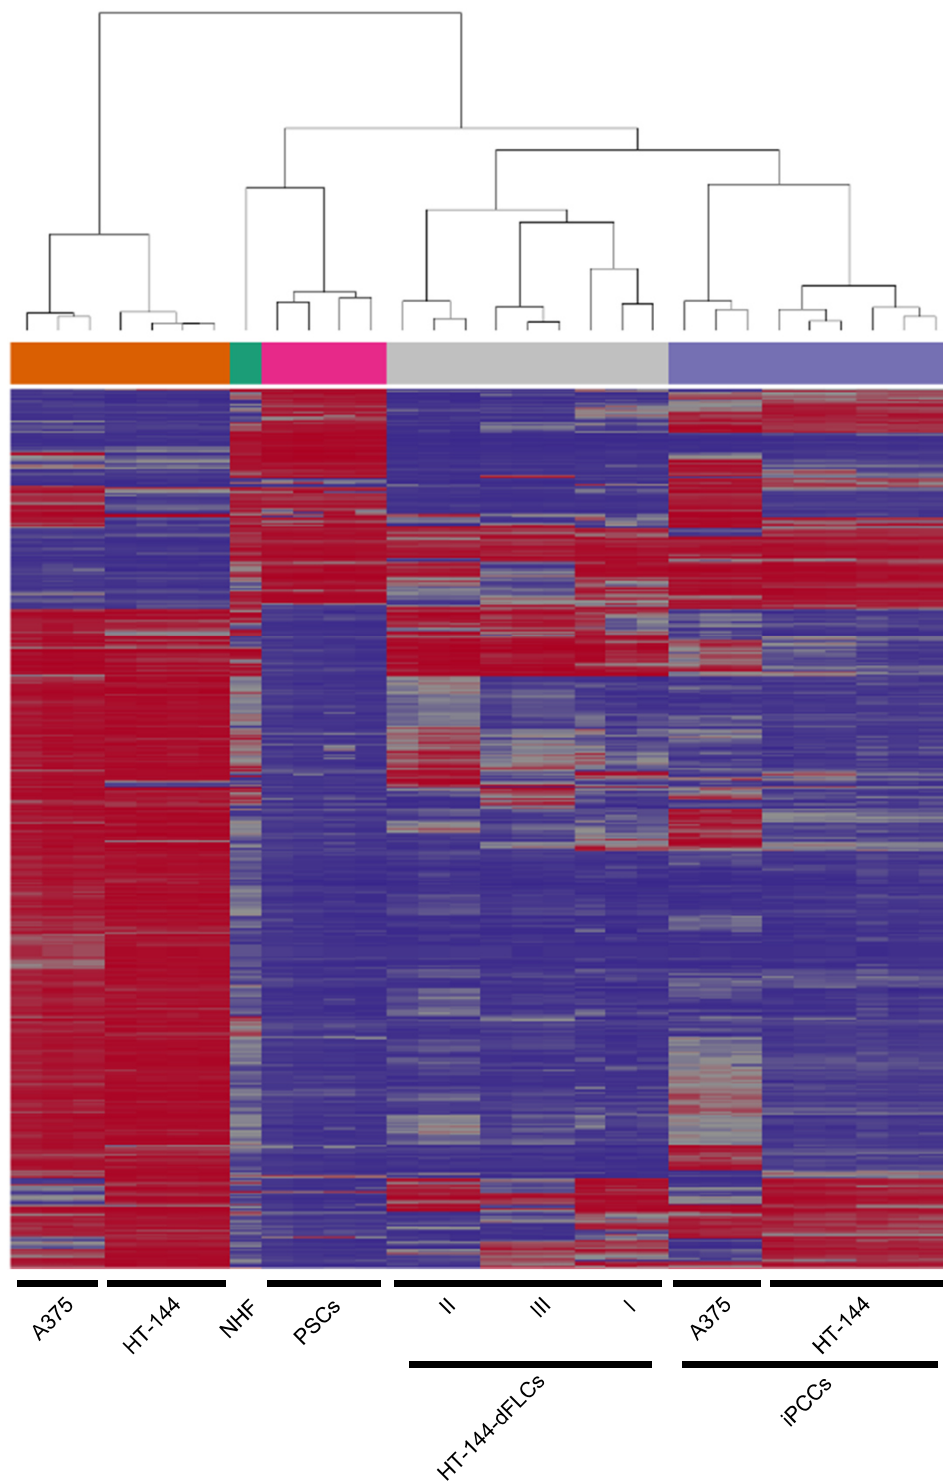

**Figure S4. Dendrogram of melanoma cells and iPCCs.** Heatmap showing the methylation profiles of melanoma cell lines, melanoma-iPCCs and iPCC-derived fibroblast-like cells compared to hiPSCs and hESCs. Rows depict promoters of Ensembl genes, and columns: individual cells. Methylation values are color-coded using a continuous scale from red (0, unmethylated) through grey (0.5, hemimethylated) to blue (1, fully methylated). Only the 500 promoters with highest variance for methylation values across all samples are displayed. The dendrogram shows the result of hierarchical clustering based on Euclidean distance and complete linkage.

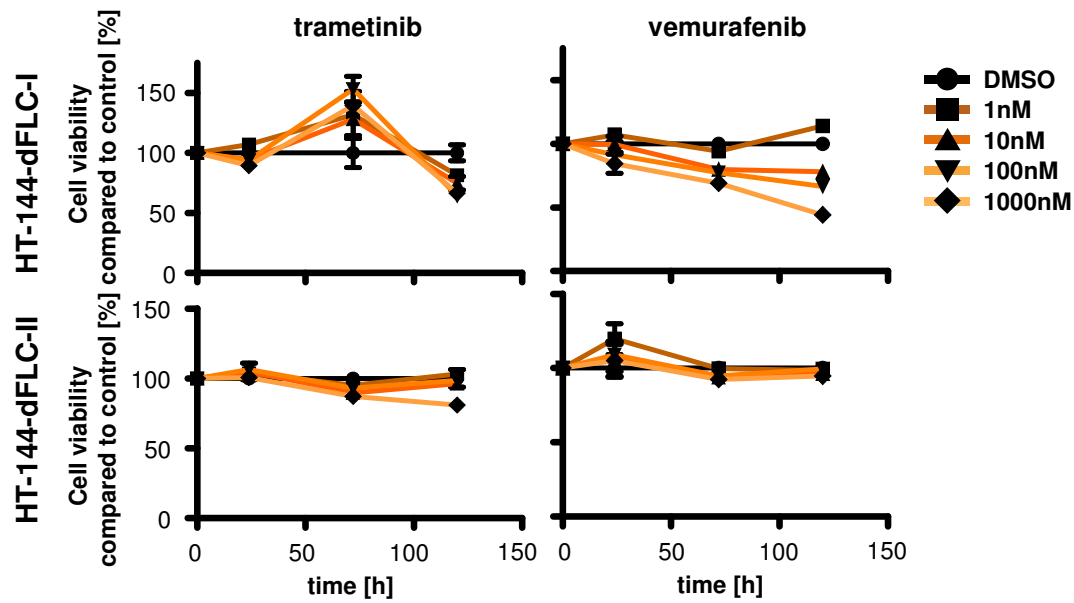

**Figure S5. Reduced response to targeted melanoma therapy in fibroblast-like differentiated melanoma cells.** Two independent differentiations of HT-144-iPCCs into fibroblast-like cells (I) & (II) were treated with increasing concentrations of the MEK inhibitor trametinib and the BRAF<sup>V600E</sup> inhibitor vemurafenib followed by cell metabolism analysis by AlamarBlue assay at indicated time points.

## Supplemental Experimental Procedures

### Plasmid constructs

The reverse tetracycline-controlled transactivator FUDeltaGW-rtTA was a gift from Konrad Hochedlinger (Addgene plasmid # 19780) (Maherali et al., 2008). FUDeltaGW-rtTA-zeocin was generated by cloning a zeocin resistance gene for the selection of eukaryotic cells into FUDeltaGW-rtTA. The doxycycline-inducible lentiviral human stem cell cassette (tetO-hSTEMCCA-loxP) was generated by exchanging the EF1a promoter from hSTEMCCA-loxP (Somers et al., 2010) for a minimal CMV promoter under the control of a tetracycline responsive element (TRE). The puromycin-selectable tetO-hSTEMCCA-puro-loxP was constructed by exchanging *MYC* from tetO-hSTEMCCA-loxP for the gene encoding the puromycin-N-acetyltransferase.

### Cell culture of primary adult human melanocytes

Melanocytes were isolated from foreskins. Excised foreskins were incubated for 15 min at room temperature in 10% Braunol solution (Braun) and then washed with PBS (Sigma-Aldrich). Afterwards, the subcutaneous fat was removed and the foreskin cut into pieces of 10 x 4 mm in size. These pieces were digested in dispase (Stemcell Technologies) (1 mg/ml) at 4°C overnight. The next day, the epidermis was peeled off the skin with a forceps followed by 15 min digestion at 37°C in trypsin solution mixed 1:1 with PBS. After digestion samples were gently vortexed and trypsin activity stopped by adding FBS. Next, cells were filtered through a 70 µm-cell strainer (BD Falcon) and centrifuged at 2500 rpm for 5 min. Primary melanocytes were washed with PBS and again spun down at 2500 rpm for 5 min, resuspended in medium 254 (Thermo Fisher Scientific) with 20 µg/ml G418 (Sigma-Aldrich) and transferred to 10 cm dishes. Medium 254 (Thermo Fisher Scientific) is supplemented with 1% (v/v) 100x human melanocyte growth supplement (HMGS) (Thermo Fisher Scientific) resulting in a final concentration of 0.2% (v/v) bovine pituitary extract, 0.5% v/v fetal bovine serum, 1 µg/ml recombinant human insulin-like growth factor-I, 5 µg/ml bovine transferrin, 3 ng/ml basic fibroblast growth factor (bFGF), 0.18 µg/ml hydrocortisone, 3 µg/ml heparin and 10 ng/ml phorbol 12-myristate 13-acetate.

### Cell culture of primary human fibroblasts

Fibroblasts were isolated from skin biopsies obtained from the department of Dermatology at the University Medical Center Mannheim. Biopsies were rinsed with 70 % ethanol and then with PBS. Adipose tissue was removed and the remaining tissue was put into a small petri dish and digested with dispase overnight at 4°C. The next day, the epidermis was removed, the dermis cut into little pieces and digested with collagenase mix (Gibco® Life Technologies) (2.5 mg/ml collagenase II & 2.5 mg/ml collagenase IV) for 1 h at 37°C with constant agitation. Centrifuge 5 min at 1200 rpm. Resuspend the tissue in fully supplemented DMEM (see above) and seed it out in small petri dishes or 6-well plates. Carefully change medium every few days. Fibroblasts will grow out from the tissue pieces. Split the cells as soon as they reach confluence.

### Generation of mitotically-inactivated feeder cells

MEFs were expanded either in T175 cell culture flasks or 150 mm cell culture dishes until passage three. Confluent MEFs were incubated with 10 µg/ml mitomycin C (Carl Roth) for 4 h and washed with PBS containing Ca<sup>2+</sup> and Mg<sup>2+</sup> for three times followed by rinsing the cells with PBS without Ca<sup>2+</sup> and Mg<sup>2+</sup> for three times. The now postmitotic cells were trypsinized for 5-7 min at 37°C until they detached followed by neutralization of the enzymatic activity with complete medium. After centrifugation these feeder cells were resuspended in 80% FBS with 20% (v/v) DMSO and aliquoted at a concentration of 1 x 10<sup>6</sup> cells per vial. Until thawing the vials were stored in liquid nitrogen.

### RNA isolation and cDNA transcription

RNA extraction was performed using the RNeasy kit (Qiagen) or PicoPure RNA isolation kit (Life Technologies) according to the manufacturer's instructions. Briefly, pelleted cells were lysed and RNA extracted using a column-based purification. Every sample was DNase I treated for 15 min at room temperature on the purification column followed by two washing steps and elution with RNase-free H<sub>2</sub>O. RNA concentration and quality were measured using a NanoDrop ND-1000 Spectrophotometer. Only samples fulfilling the quality recommendations were further analyzed. From each sample 500 ng RNA were incubated with oligo (dT)18 primers in a volume of 12 µl for five min at 65°C. Reverse transcription was performed using the RevertAid First Strand cDNA Synthesis Kit (Thermo Fisher Scientific) according to the manufacturer's advice. Before use cDNA was diluted 1:5 in nuclease-free H<sub>2</sub>O.

### Quantitative real-time polymerase chain reaction (qPCR)

QPCR was performed using SYBR Green PCR Master Mix (Applied Biosystems) and an Applied Biosystems 7500 Real-Time PCR System. Each primer pair was evaluated and amplification efficiency confirmed to lie in a range from 85-110%. Gene quantification was calculated using the Pfaffl method (Bustin et al., 2009) calculating the delta-delta Ct in three technical replicates. Results were normalized to *GAPDH* and *18S* RNA or *GAPDH* and B-actin if not otherwise stated, serving as endogenous controls. Statistical analysis was carried out in Excel and visualization of graphs in GraphPad Prism 5. Following primers were used in the study:

|                   | Forward primer                  | Reverse primer                   |
|-------------------|---------------------------------|----------------------------------|
| <i>SOX2_endo</i>  | <i>GCTAGTCTCCAAGCGACGAA</i>     | <i>GCAAGAAGCCTCTCCTTGAA</i>      |
| <i>OCT4_endo</i>  | <i>GACAGGGGGAGGGGAGGAGCTAGG</i> | <i>CTTCCCTCCAACCAGTTGCCCAAAC</i> |
| <i>NANOG_endo</i> | <i>CAGTCTGGACACTGGCTGAA</i>     | <i>CTCGCTGATTAGGCTCCAAC</i>      |
| <i>SALL4</i>      | <i>ATTCCCTGGGTGGTTCACT</i>      | <i>AGCACATCAACTCGGAGGAG</i>      |
| <i>TET1</i>       | <i>CGCTACGAAGCACCTCTCTTA</i>    | <i>CTTGCAATTGGAACCGAATCATT</i>   |
| <i>DPPA4</i>      | <i>GACCTCCACAGAGAAGTCGAG</i>    | <i>TGCCTTTTTCTTAGGGCAGAG</i>     |
| <i>NODAL</i>      | <i>CAGTACAACGCCTATCGCTGT</i>    | <i>TGCATGGTTGGTCGGATGAAA</i>     |
| <i>LEFTY1</i>     | <i>AGGAGCTGGTCATCCCCAC</i>      | <i>GCCACCTCTCGGAAGCTCT</i>       |
| <i>LEFTY2</i>     | <i>TGGACCTCAGGGACTATGGAG</i>    | <i>CCGAGGCGATACTACTGTCTG</i>     |
| <i>DNMT3L</i>     | <i>TGAACAAGGAAGACCTGGACG</i>    | <i>CAGTGCCTGCTCCTTATGGCT</i>     |
| <i>PAX6</i>       | <i>AACGATAACATACCAAGCGTGT</i>   | <i>GGTCTGCCCCGTTCAACATC</i>      |
| <i>MAP2</i>       | <i>CGAAGCGCCAATGGATTCC</i>      | <i>TGAACTATCCTTGCAGACACCT</i>    |
| <i>RBFOX3</i>     | <i>TCGTAGAGGGACGGAAAATTGA</i>   | <i>GCCGTTGGTGTAGGGGGTTC</i>      |
| <i>MITF-M</i>     | <i>AGAGGGAGGGATAGTCTACCG</i>    | <i>ACTTGGTGGGGTTTTTCGAGG</i>     |
| <i>AP2</i>        | <i>GGAGACGTAAAGCTGCCAAC</i>     | <i>GGTCGGTGAACCTCTTTCAT</i>      |
| <i>SOX10</i>      | <i>AGCCAGGTGAAGACAGAGA</i>      | <i>ATAGGGTCTGAGGGCTGAT</i>       |
| <i>TRP1</i>       | <i>AGCAGTAGTTGGCGCTTTGT</i>     | <i>TCAGTGAGGAGAGGCTGGTT</i>      |
| E-cadherin        | <i>AGCCAACCTTAACTGAGGAGT</i>    | <i>GGCAAGTTGATTGGAGGGATG</i>     |
| <i>GAPDH</i>      | <i>GAAGGTGAAGGTCTGGAGTC</i>     | <i>GAAGATGGTGTATGGGATTC</i>      |
| B-actin           | <i>GGATGCCACAGGATTCCATACCCA</i> | <i>TCACCCACACTGTGCCGATCTACGA</i> |
| <i>18S</i>        | <i>GAGGATGAGGTGGAACGTGT</i>     | <i>TCTTCAGTTCGCTCCAGGTCT</i>     |

### Genomic DNA isolation and cell authentication

Genomic DNA was isolated using the QIAGEN DNeasy Blood & Tissue Kit according to the manufacturer's instructions. Briefly, cells were lysed and digested with proteinase K for 10 min at 56°C. Genomic DNA was isolated from the mixture through column purification and eluted with water. DNA concentration and quality were measured using a NanoDrop ND-1000 Spectrophotometer. A 24-plex single nucleotide polymorphism profiling assay was performed by MULTIPLEXION as described in Castro et al. (2013) to confirm their common identity. Additionally, cell authentication was performed by DMSZ applying short tandem repeat DNA typing and comparison to the DNA reference database of human cell lines.

### Fluorescence *in situ* hybridization (FISH)

Dual-color fluorescent *in situ* hybridization (FISH) with locus specific FISH probes for *BRAF* (Chr. 7), *MAP2K1* (*MEK1*) (Chr. 15), *MAP2K2* (*MEK2*) (Chr. 19), *MAPK3* (*ERK1*) (Chr. 16) and *MAPK1* (*ERK2*) (Chr. 22) on parental melanoma cells as well on melanoma-derived iPCCs was performed as recently described (Orouji et al., 2016).

### Immunofluorescence and alkaline phosphatase staining

Tumor and feeder cells were seeded on gelatin-coated coverslips while neuronal differentiated cells were seeded on Matrigel-coated coverslips. For nuclear staining cells were fixed in methanol for 7 min at -20°C and subsequently rinsed with -20°C cold acetone. Samples for surface marker staining were fixed in 4% paraformaldehyde (PFA) (Sigma-Aldrich) for 5 min at room temperature and permeabilized with 0.1% Tween 20 (AppliChem) in PBS for additional 5 min. Blocking was performed with PBS containing 0.5% (w/v) BSA (Carl Roth), 1% (v/v) FCS and 0.1% (v/v) Triton X-100 (Carl Roth) for 30 min at room temperature. Then, samples were incubated with primary antibodies overnight at 4°C in blocking solution with the indicated dilutions: rabbit anti-NANOG (Abcam, cat. no. ab80892) 1:150, mouse anti-TRA-1-60 (Cell Signaling Technology, cat. no. 4746) 1:250, mouse anti-TRA-1-81 (Cell Signaling Technology, cat. no. 4745) 1:250 and rabbit anti-B3-tubulin (TUJ-1) (Synaptic Systems, cat. no. 302302) 1:250. Samples were washed twice with blocking solution and incubated with either Atto 488 goat anti-rabbit IgG (Sigma-Aldrich, cat. no. 18772) 1:500, Atto 647 goat anti-mouse IgG (Sigma-Aldrich, cat. no. 50815) 1:500 or Atto 647 goat anti-rabbit IgG (Sigma-Aldrich, cat. no. 40839) 1:500 in blocking solution for 4 h at 4°C. Afterwards, samples were washed twice, counterstained with 100 ng/ml DAPI (Roche diagnostics) in PBS and mounted with Dako Fluorescent Mounting Medium (Dako, S3023). The next day samples were analyzed with a Nikon ECLIPSE Ti fluorescent microscope. Staining for alkaline phosphatase activity was performed using the Stemgent Alkaline Phosphatase Staining Kit II according to the manufacturer's protocol. Following fixation, cells were washed with PBS and incubated with AP staining solution for 15 min at room temperature. The reaction was stopped by washing with PBS and pictures were taken using a Nikon ECLIPSE TS 100 light microscope.

### Whole genome expression analysis

Whole genome expression profiling was performed at the DKFZ Core Facility for Genomics and Proteomics. Samples were analyzed on a HumanHT-12 v4 Expression BeadChip (Illumina) that is able to quantify expression levels of 48107 human genes. 1 µg total RNA from three (HT-144) or two independent experiments, respectively, was isolated as described and sent to microarray analysis using Illumina HumanHT-12v4



Expression BeadChip at the DKFZ Genomics and Proteomics Core Facility. Resulting raw data were exported to Chipster software. First, array data were  $\log_2$  transformed and quantile normalized. For assessing differentially regulated genes two group test or several group test using empirical Bayes method were performed with a p value adjustment according to Benjamini-Hochberg (BH). P value threshold was set to 0.05 to filter for significantly deregulated genes. Differentially expressed genes were clustered using Spearman correlation as a distance measure visualizing up-regulated genes in red and downregulated genes in green. As result of the hierarchical clustering dendrograms were constructed by the average linkage method. Gene sets were analyzed for enrichment of distinct pathways using DAVID software from the Bioinformatics Resources from the National Institute of Allergy and Infectious Diseases (NIAID), NIH (<http://david.abcc.ncifcrf.gov/>) and pathway analysis was performed by MetaCore, THOMSON REUTERS (<https://portal.genego.com/>). The data discussed in this publication have been deposited in NCBI's Gene Expression Omnibus (Edgar et al., 2002) and are accessible through GEO Series accession number GSE95281 (<https://www.ncbi.nlm.nih.gov/geo/query/acc.cgi?acc=GSE95281>).

### **Immunohistochemical staining**

Tissue samples were isolated, washed and fixed in 4% PFA overnight at room temperature. Paraffin-embedded samples were cut and sections were deparaffinized in xylene followed by rehydration. After antigen retrieval the following targets were stained: S100B (Santa Cruz, cat. no. sc-7851), KI67 (Abcam, cat. no. ab15580), PanCK (Dako, cat. no. Z062201-2), BRAF<sup>V600E</sup> (ZytoMed Systems, cat. no. E19290), CK20 (Dako, cat. no. M701929-2), MelanA (Vector laboratories, cat. no. VP-M646), SOX2 (Abcam, cat. no. ab97959), p44/42 (Cell Signaling Technologies, cat. no. 4695), phospho-p44/42 (Cell Signaling Technologies, cat. no. 9106). Afterwards, samples were counterstained with haematoxylin. For histological analysis of tumors and evaluation of teratomas, sections were stained with haematoxylin and eosin (H&E). All samples were analyzed under a Leica DM LS light microscope.

## Supplemental References

Bustin, S.A., Benes, V., Garson, J.A., Hellemans, J., Huggett, J., Kubista, M., Mueller, R., Nolan, T., Pfaffl, M.W., Shipley, G.L. et al. (2009). The MIQE guidelines: minimum information for publication of quantitative real-time PCR experiments. *Clin Chem*. 55(4):611-22.

Castro, F., Dirks, W.G., Fähnrich, S., Hotz-Wagenblatt, A., Pawlita, M., and Schmitt, M. (2013). High-throughput SNP-based authentication of human cell lines. *Int J Cancer* 132(2):308-14.

Maherali, N., Ahfeldt, T., Rigamonti, A., Utikal, J., Cowan, C., and Hochedlinger, K. (2008). A high-efficiency system for the generation and study of human induced pluripotent stem cells. *Cell Stem Cell* 3(3):340-5.

Orouji, E., Orouji, A., Gaiser, T., Larribère, L., Gebhardt, C., and Utikal, J. (2016). MAP kinase pathway gene copy alterations in NRAS/BRAF wild-type advanced melanoma. *Int J Cancer* 138(9):2257-62.

Somers, A., Jean, J.C., Sommer, C.A., Omari, A., Ford, C.C., Mills, J.A., Ying, L., Sommer, A.G., Jean, J.M., Smith, B.W. et al. (2010). Generation of transgene-free lung disease-specific human induced pluripotent stem cells using a single excisable lentiviral stem cell cassette. *Stem Cells* 28(10):1728-40.
